# Supplementary material for: Rheological transitions in the middle crust: insights from Cordilleran metamorphic core complexes
Source: Copernicus journal article supplement (doi:10.5194/se-8-199-2017), 2017-02-21
Supplement: Supplementary file 1 [file TableS1_U-Pb_zircon_data.xlsx]

## Sheet: PlotDat1
Source sheet	Behr 208 corrected	2.591	0.2138	200		400		600		800		1000		1200		1400		1600		0	0	0	0	0.217708	0.0315113	0	0.00172097	2.73539	0.225417	2.98513	0.241787	0.0300806	0.00416084	0.0414842	0.00416991	0.222443	0.0279997	0.0444776	0.00352724	0.0344052	0.00370694	0.0300498	0.00378487	1.39411	0.100446	0.0275967	0.00393831	0.0282298	0.00350588
Plot name	Concordia1	2.79	0.2283	0.218107	0.0315113	0.483784	0.0640155	0.807407	0.097544	1.20161	0.132129	1.6818	0.167804	2.26672	0.204603	2.97921	0.242562	3.84709	0.281716	0.0570667	0.00877985	0.11739	0.017606	0.482812	0.0640155	3.64763	0.3	2.7326	0.225417	2.98132	0.242334	0.0300274	0.00418998	0.0413084	0.00421133	0.222068	0.0282884	0.0441127	0.00359646	0.0343034	0.0037443	0.0299638	0.00382808	1.39138	0.100813	0.0275576	0.00396549	0.0281392	0.00353548
Plot Type	1	0.02739	0.004033	0.218099	0.0315195	0.483765	0.0640324	0.807373	0.0975701	1.20156	0.132165	1.68171	0.16785	2.26659	0.20466	2.97903	0.24263	3.84685	0.281798	0.11739	0.0176368	0.181156	0.0265249	0.805631	0.097544			2.72437	0.224971	2.97017	0.242342	0.0298729	0.00421309	0.0407891	0.00424604	0.220995	0.0285226	0.0430328	0.00365793	0.0340027	0.00377776	0.0297108	0.00386617	1.38337	0.100823	0.0274451	0.00398716	0.0278723	0.00356033
1st free col	69	0.03237	0.004037	0.218076	0.0315273	0.48371	0.0640486	0.807272	0.0975952	1.20139	0.132199	1.68147	0.167895	2.26623	0.204715	2.97851	0.242697	3.84613	0.281876	0.181156	0.0265715	0.248561	0.035522	1.19873	0.132129			2.71101	0.224096	2.95209	0.24181	0.0296229	0.00422928	0.0399463	0.00427272	0.219264	0.0286933	0.0412796	0.0037093	0.0335148	0.00380605	0.0293007	0.00389769	1.3704	0.100473	0.0272636	0.00400248	0.0274393	0.00357949
Sigma Level	1	0.2039	0.02687	0.218039	0.0315346	0.48362	0.0640636	0.807107	0.0976184	1.20113	0.132231	1.68106	0.167936	2.26564	0.204766	2.97767	0.242758	3.84496	0.281948	0.248561	0.0355846	0.395129	0.0537534	1.67741	0.167804			2.69304	0.222825	2.92778	0.240759	0.0292871	0.00423792	0.0388124	0.00429034	0.216943	0.0287939	0.0389203	0.00374859	0.0328584	0.00382806	0.0287491	0.00392142	1.35294	0.0997785	0.0270202	0.00401087	0.0268568	0.0035922
Absolute Errs	TRUE	0.02551	0.003395	0.21799	0.0315409	0.483499	0.0640767	0.806887	0.0976386	1.20077	0.132259	1.68051	0.167972	2.26484	0.204811	2.97654	0.242811	3.84338	0.282011	0.319812	0.0446769	0.474745	0.0629891	2.2603	0.204603			2.67114	0.221207	2.89817	0.239229	0.0288784	0.0042387	0.0374308	0.00429823	0.214121	0.0288205	0.0360457	0.0037743	0.0320587	0.00384297	0.0280772	0.00393644	1.33169	0.0987653	0.0267241	0.00401199	0.0261473	0.003598
Symbol Type	1	0.02913	0.003643	0.217929	0.0315461	0.483352	0.0640874	0.806617	0.0976553	1.20033	0.132282	1.67985	0.168001	2.26387	0.204847	2.97516	0.242855	3.84146	0.282063	0.395129	0.053849	0.558903	0.0723058	2.97009	0.242562			2.64617	0.219305	2.86441	0.237279	0.0284125	0.00423156	0.0358548	0.00429607	0.210907	0.0287722	0.0327662	0.00378542	0.0311465	0.00385019	0.0273109	0.00394219	1.30745	0.0974726	0.0263867	0.00400582	0.0253379	0.00359664
Inverse Plot	FALSE	0.02562	0.003695	0.21786	0.03155	0.483184	0.0640954	0.80631	0.0976676	1.19983	0.132299	1.67909	0.168023	2.26276	0.204874	2.97358	0.242888	3.83927	0.282101	0.474745	0.0631017	0.741903	0.0911848	3.83441	0.281716			2.61908	0.217191	2.82779	0.234984	0.0279074	0.0042168	0.0341449	0.00428396	0.207423	0.0286508	0.0292079	0.00378155	0.0301568	0.00384945	0.0264796	0.00393844	1.28116	0.0959499	0.026021	0.00399258	0.0244598	0.00358819
Color Plot	TRUE	1.254	0.09149	0.217785	0.0315524	0.483001	0.0641003	0.805977	0.0976753	1.19929	0.13231	1.67827	0.168037	2.26155	0.204891	2.97187	0.242908	3.83689	0.282125	0.558903	0.0724355	0.841308	0.100749	IsoLine	IsoLine			2.59091	0.214947	2.78971	0.232432	0.0273823	0.00419497	0.0323667	0.00426236	0.203803	0.028461	0.0255074	0.00376282	0.0291276	0.00384078	0.0256153	0.00392533	1.25382	0.0942558	0.025641	0.00397279	0.0235468	0.00357297
3D plot	FALSE	0.02565	0.003822	0.217708	0.0315532	0.482812	0.064102	0.805631	0.0976778	1.19873	0.132313	1.67741	0.168041	2.2603	0.204897	2.97009	0.242915	3.83441	0.282133	0.647865	0.0818514	0.946385	0.110396					2.56274	0.212658	2.75165	0.229722	0.0268575	0.00416692	0.0305887	0.0042321	0.200187	0.02821	0.0218071	0.00372995	0.0280985	0.0038245	0.0247512	0.00390338	1.22649	0.0924555	0.0252614	0.0039472	0.0226339	0.00355156
Linear	FALSE	0.02355	0.003412	0.21763	0.0315524	0.482622	0.0641003	0.805284	0.0976753	1.19817	0.13231	1.67655	0.168037	2.25905	0.204891	2.96832	0.242908	3.83194	0.282125	0.741903	0.0913499	1.17487	0.129946					2.53566	0.210414	2.71506	0.226956	0.0263532	0.00413372	0.0288791	0.00419434	0.196714	0.0279076	0.018249	0.00368421	0.0271091	0.00380125	0.0239205	0.00387341	1.20022	0.090618	0.0248967	0.0039168	0.0217561	0.00352479
Data Range	J6:N24	0.01796	0.003269	0.217555	0.03155	0.48244	0.0640954	0.804951	0.0976676	1.19763	0.132299	1.67573	0.168023	2.25785	0.204874	2.96661	0.242888	3.82956	0.282101	0.841308	0.100932	1.29898	0.139849					2.5107	0.2083	2.68135	0.224243	0.0258888	0.00409665	0.0273037	0.00415054	0.193517	0.0275652	0.01497	0.00362736	0.0261973	0.00377192	0.023155	0.00383659	1.17601	0.0888141	0.024561	0.00388276	0.0209474	0.00349368
Filled Symbols	TRUE	0.02961	0.004499	0.217486	0.0315461	0.482271	0.0640874	0.804644	0.0976553	1.19713	0.132282	1.67497	0.168001	2.25674	0.204847	2.96503	0.242855	3.82737	0.282063	0.946385	0.110598	1.43018	0.14984					2.48883	0.206397	2.65182	0.221685	0.025482	0.00405713	0.025923	0.00410237	0.190719	0.0271962	0.012096	0.00356158	0.0253982	0.00373763	0.0224843	0.00379432	1.15481	0.087113	0.0242671	0.00384638	0.0202386	0.00345944
ConcAge	FALSE	0.01606	0.003569	0.217425	0.0315409	0.482124	0.0640767	0.804375	0.0976386	1.19669	0.132259	1.67431	0.167972	2.25577	0.204811	2.96365	0.242811	3.82545	0.282011	1.05746	0.120349	1.71546	0.170084					2.47089	0.204778	2.6276	0.219382	0.0251486	0.00401669	0.02479	0.00405169	0.188428	0.0268146	0.00973756	0.00348939	0.0247425	0.00369971	0.0219341	0.00374824	1.13741	0.0855801	0.0240263	0.00380906	0.0196571	0.00342337
ConcSwap	FALSE	0.02713	0.003775	0.217376	0.0315346	0.482003	0.0640636	0.804154	0.0976184	1.19633	0.132231	1.67376	0.167936	2.25497	0.204766	2.96252	0.242758	3.82387	0.281948	1.17487	0.130185	1.87042	0.180339					2.45756	0.203507	2.60961	0.217421	0.0249013	0.00397688	0.0239484	0.00400044	0.186731	0.0264351	0.00798521	0.00341358	0.0242554	0.00365961	0.0215256	0.00370012	1.12449	0.0842743	0.023848	0.00377225	0.0192252	0.00338687
1st Symbol-row	1	0.02345	0.003892	0.217339	0.0315273	0.481913	0.0640486	0.80399	0.0975952	1.19607	0.132199	1.67336	0.167895	2.25438	0.204715	2.96168	0.242697	3.8227	0.281876	1.29898	0.140108	2.03423	0.190684					2.44936	0.20263	2.59856	0.215878	0.0247496	0.00393922	0.0234303	0.0039506	0.185694	0.0260723	0.00690632	0.00333706	0.0239557	0.00361887	0.0212744	0.00365179	1.11655	0.0832458	0.0237389	0.00373734	0.0189595	0.00335133
		0.03204	0.003928	0.217316	0.0315195	0.481858	0.0640324	0.803889	0.0975701	1.1959	0.132165	1.67311	0.16785	2.25401	0.20466	2.96116	0.24263	3.82198	0.281798	1.43018	0.150118	2.39041	0.211647					2.44661	0.202183	2.59487	0.214813	0.0246994	0.00390516	0.0232558	0.00390409	0.185357	0.0257403	0.00654237	0.00326276	0.0238548	0.00357906	0.0211902	0.00360513	1.11389	0.0825341	0.0237033	0.00370569	0.0188702	0.00331812
		0.02934	0.003917	0.217308	0.0315113	0.481839	0.0640155	0.803855	0.097544	1.19585	0.132129	1.67302	0.167804	2.25389	0.204603	2.96098	0.242562	3.82173	0.281716	1.56886	0.160216	2.58389	0.222267					2.4494	0.202183	2.59868	0.214266	0.0247526	0.00387602	0.0234316	0.00386267	0.185732	0.0254516	0.00690732	0.00319354	0.0239566	0.0035417	0.0212762	0.00356192	1.11662	0.0821666	0.0237424	0.00367851	0.0189608	0.00328852
		0.03479	0.004	0.217316	0.0315031	0.481858	0.0639987	0.803889	0.0975179	1.1959	0.132093	1.67311	0.167758	2.25401	0.204546	2.96116	0.242493	3.82198	0.281635	1.71546	0.170402	2.78842	0.23298					2.45763	0.202629	2.60983	0.214258	0.0249071	0.00385291	0.0239509	0.00382796	0.186805	0.0252174	0.00798717	0.00313207	0.0242573	0.00350824	0.0215292	0.00352383	1.12463	0.0821574	0.0238549	0.00365684	0.0192277	0.00326367
		IsoLine	IsoLine	0.217339	0.0314953	0.481913	0.0639825	0.80399	0.0974929	1.19607	0.132059	1.67336	0.167713	2.25438	0.204491	2.96168	0.242426	3.8227	0.281557	1.87042	0.180678	3.23314	0.254687					2.47099	0.203504	2.62791	0.21479	0.0251571	0.00383672	0.0247937	0.00380128	0.188536	0.0250467	0.00974041	0.0030807	0.0247452	0.00347995	0.0219393	0.00349231	1.1376	0.0825069	0.0240364	0.00364152	0.0196607	0.00324451
				0.217376	0.031488	0.482003	0.0639675	0.804154	0.0974697	1.19633	0.132027	1.67376	0.167672	2.25497	0.20444	2.96252	0.242365	3.82387	0.281485	2.03423	0.191045	3.47471	0.265684					2.48896	0.204775	2.65222	0.215841	0.0254929	0.00382808	0.0259276	0.00378366	0.190857	0.0249461	0.0120997	0.00304141	0.0254016	0.00345794	0.0224909	0.00346858	1.15506	0.0832015	0.0242798	0.00363313	0.0202432	0.0032318
				0.217425	0.0314817	0.482124	0.0639544	0.804375	0.0974495	1.19669	0.131999	1.67431	0.167636	2.25577	0.204395	2.96365	0.242312	3.82545	0.281422	2.20738	0.201502	3.73007	0.276777					2.51086	0.206393	2.68183	0.217371	0.0259016	0.0038273	0.0273092	0.00377577	0.193679	0.0249195	0.0149743	0.0030157	0.0262013	0.00344303	0.0231628	0.00345356	1.17631	0.0842147	0.0245759	0.00363201	0.0209527	0.003226
				0.217486	0.0314764	0.482271	0.0639437	0.804644	0.0974328	1.19713	0.131976	1.67497	0.167607	2.25674	0.204359	2.96503	0.242268	3.82737	0.28137	2.39041	0.212051	4	0.287968					2.53583	0.208295	2.71559	0.219321	0.0263675	0.00383444	0.0288852	0.00377793	0.196893	0.0249678	0.0182538	0.00300458	0.0271135	0.00343581	0.0239291	0.00344781	1.20055	0.0855074	0.0249133	0.00363818	0.0217621	0.00322736
				0.217555	0.0314726	0.48244	0.0639357	0.804951	0.0974205	1.19763	0.131959	1.67573	0.167585	2.25785	0.204332	2.96661	0.242235	3.82956	0.281331	2.58389	0.222692	4	0.289099					2.56292	0.210409	2.75221	0.221616	0.0268726	0.0038492	0.0305951	0.00379004	0.200377	0.0250892	0.0218121	0.00300845	0.0281032	0.00343655	0.0247604	0.00345156	1.22684	0.0870301	0.025279	0.00365142	0.0226402	0.00323581
				0.21763	0.0314702	0.482622	0.0639307	0.805284	0.0974128	1.19817	0.131949	1.67655	0.167571	2.25905	0.204315	2.96832	0.242215	3.83194	0.281308	2.78842	0.233427	4	0.289098					2.59109	0.212653	2.79029	0.224168	0.0273977	0.00387103	0.0323733	0.00381164	0.203997	0.025279	0.0255126	0.00302718	0.0291324	0.00344522	0.0256247	0.00346467	1.25418	0.0887242	0.025659	0.00367121	0.0235532	0.00325103
				0.217708	0.0314694	0.482812	0.0639291	0.805631	0.0974103	1.19873	0.131945	1.67741	0.167567	2.2603	0.204309	2.97009	0.242208	3.83441	0.2813	3.00461	0.244257	3.47471	0.266719					2.61926	0.214942	2.82835	0.226878	0.0279225	0.00389908	0.0341513	0.0038419	0.207613	0.02553	0.0292129	0.00306005	0.0301615	0.0034615	0.0264888	0.00348662	1.28151	0.0905245	0.0260386	0.0036968	0.0244661	0.00327244
				0.217785	0.0314702	0.483001	0.0639307	0.805977	0.0974128	1.19929	0.131949	1.67827	0.167571	2.26155	0.204315	2.97187	0.242215	3.83689	0.281308	3.23314	0.255181	3.23314	0.255675					2.64634	0.217186	2.86494	0.229644	0.0284268	0.00393228	0.0358609	0.00387966	0.211086	0.0258324	0.032771	0.00310579	0.0311509	0.00348475	0.0273195	0.00351659	1.30778	0.092362	0.0264033	0.0037272	0.0253439	0.00329921
				0.21786	0.0314726	0.483184	0.0639357	0.80631	0.0974205	1.19983	0.131959	1.67909	0.167585	2.26276	0.204332	2.97358	0.242235	3.83927	0.281331	3.47471	0.266201	3.00461	0.244727					2.6713	0.2193	2.89865	0.232357	0.0288912	0.00396935	0.0374363	0.00392346	0.214283	0.0261748	0.03605	0.00316264	0.0320627	0.00351408	0.028085	0.00355341	1.33199	0.0941659	0.026739	0.00376124	0.0261526	0.00333032
				0.217929	0.0314764	0.483352	0.0639437	0.806617	0.0974328	1.20033	0.131976	1.67985	0.167607	2.26387	0.204359	2.97516	0.242268	3.84146	0.28137	3.73007	0.277319	2.58389	0.223118					2.69317	0.221203	2.92818	0.234915	0.029298	0.00400887	0.038817	0.00397163	0.217081	0.0265438	0.038924	0.00322842	0.0328618	0.00354837	0.0287557	0.00359568	1.35319	0.095867	0.0270329	0.00379762	0.0268614	0.00336456
				0.21799	0.0314817	0.483499	0.0639544	0.806887	0.0974495	1.20077	0.131999	1.68051	0.167636	2.26484	0.204395	2.97654	0.242312	3.84338	0.281422	4	0.288533	2.39041	0.212454					2.71111	0.222822	2.9524	0.237218	0.0296314	0.00404931	0.03995	0.00402231	0.219372	0.0269254	0.0412824	0.00330061	0.0335175	0.00358629	0.0293059	0.00364176	1.37059	0.0973999	0.0272737	0.00383494	0.0274429	0.00340063
				0.218039	0.031488	0.48362	0.0639675	0.807107	0.0974697	1.20113	0.132027	1.68106	0.167672	2.26564	0.20444	2.97767	0.242365	3.84496	0.281485	4	0.288533	2.20738	0.201883					2.72444	0.224093	2.97039	0.239179	0.0298787	0.00408912	0.0407916	0.00407356	0.221069	0.0273049	0.0430348	0.00337642	0.0340046	0.00362639	0.0297144	0.00368988	1.38351	0.0987057	0.027452	0.00387175	0.0278748	0.00343713
				0.218076	0.0314953	0.48371	0.0639825	0.807272	0.0974929	1.20139	0.132059	1.68147	0.167713	2.26623	0.204491	2.97851	0.242426	3.84613	0.281557	IsoLine	IsoLine	1.87042	0.181018					2.73264	0.22497	2.98144	0.240722	0.0300304	0.00412678	0.0413097	0.0041234	0.222106	0.0276677	0.0441137	0.00345294	0.0343043	0.00366713	0.0299656	0.00373821	1.39145	0.0997342	0.0275611	0.00390666	0.0281405	0.00347267
				0.218099	0.0315031	0.483765	0.0639987	0.807373	0.0975179	1.20156	0.132093	1.68171	0.167758	2.26659	0.204546	2.97903	0.242493	3.84685	0.281635			1.71546	0.170721					2.73539	0.225417	2.98513	0.241787	0.0300806	0.00416084	0.0414842	0.00416991	0.222443	0.0279997	0.0444776	0.00352724	0.0344052	0.00370694	0.0300498	0.00378487	1.39411	0.100446	0.0275967	0.00393831	0.0282298	0.00350588
				0.218107	0.0315113	0.483784	0.0640155	0.807407	0.097544	1.20161	0.132129	1.6818	0.167804	2.26672	0.204603	2.97921	0.242562	3.84709	0.281716			1.56886	0.160514					ErrEll	ErrEll	ErrEll	ErrEll	ErrEll	ErrEll	ErrEll	ErrEll	ErrEll	ErrEll	ErrEll	ErrEll	ErrEll	ErrEll	ErrEll	ErrEll	ErrEll	ErrEll	ErrEll	ErrEll	ErrEll	ErrEll
				ConcTikEll	ConcTikEll	ConcTikEll	ConcTikEll	ConcTikEll	ConcTikEll	ConcTikEll	ConcTikEll	ConcTikEll	ConcTikEll	ConcTikEll	ConcTikEll	ConcTikEll	ConcTikEll	ConcTikEll	ConcTikEll			1.29898	0.140367
																						1.17487	0.130425
																						1.05746	0.120569
																						0.841308	0.101115
																						0.741903	0.091515
																						0.647865	0.0819987
																						0.474745	0.0632142
																						0.395129	0.0539447
																						0.319812	0.0447559
																						0.181156	0.0266181
																						0.11739	0.0176676
																						0.0570667	0.00879511
																						0	0
																						ConcBand	ConcBand
[truncated: 18 more columns]

## Sheet: PlotDat2
Source sheet	Behr corrected	0.02739	0.004033	0.0179154	0.00279615	0.02194	0.00341858	0.0259805	0.00404139	0.030037	0.0046646	0.0341095	0.00528818	0.0153351	0.0024	0.0153619	0.0024	0.0153085	0.0024	0.0138834	0.00217411	0.00795319	0.0024	0.0300806	0.00416084	0.0414842	0.00416991	0.0444776	0.00352724	0.0344052	0.00370694	0.0300498	0.00378487	0.0275967	0.00393831	0.0282298	0.00350588	0.0242911	0.00335267	0.0359093	0.00455788	0.0198157	0.00359049	0.0324597	0.00388681	0.0294145	0.00397189	0.0382545	0.00402813
Plot name	Concordia2	0.03237	0.004037	0.0179142	0.00279719	0.0219385	0.00341984	0.0259787	0.00404289	0.0300349	0.00466632	0.0341071	0.00529014	0.0153351	0.0024	0.0159996	0.00249896	0.0153351	0.00240416	0.0178854	0.00279615	0.0458472	0.0054	0.0300202	0.00419172	0.0413593	0.0042052	0.0442927	0.00357714	0.0343328	0.00373862	0.029952	0.00383079	0.0275523	0.00396712	0.0281654	0.00353109	0.0242042	0.00339231	0.0358229	0.00460773	0.0197334	0.00362949	0.0323862	0.00392372	0.0293326	0.00401018	0.038169	0.00407386
Plot Type	1	0.02551	0.003395	0.0179106	0.00279813	0.0219341	0.003421	0.0259735	0.00404426	0.0300289	0.00466791	0.0341003	0.00529194	0.0159996	0.0025033	0.0166645	0.00260209	0.0159996	0.00250764	0.0219031	0.00341858			0.0298449	0.00421566	0.0409893	0.00423589	0.0437422	0.0036235	0.0341186	0.0037677	0.0296649	0.00387079	0.0274248	0.00398959	0.0279752	0.00355306	0.023947	0.00342858	0.0355671	0.00465461	0.0194905	0.00366584	0.0321694	0.00395657	0.0290903	0.00404525	0.0379163	0.00411561
1st free col	55	0.02913	0.003643	0.017905	0.00279892	0.0219273	0.00342197	0.0259654	0.0040454	0.0300195	0.00466922	0.0340896	0.00529343	0.0166645	0.00260661	0.0173298	0.00270523	0.0166645	0.00261113	0.0259368	0.00404139			0.0295622	0.00423163	0.0403841	0.00426116	0.0428368	0.00366541	0.0337682	0.00379337	0.0292011	0.00390309	0.0272196	0.00400473	0.0276642	0.00357118	0.0235265	0.0034605	0.0351487	0.00469724	0.0190977	0.00369796	0.031815	0.00398448	0.0286941	0.00407614	0.0375033	0.00415225
Sigma Level	1	0.02562	0.003695	0.0178978	0.00279949	0.0219184	0.00342266	0.0259549	0.00404622	0.0300073	0.00467016	0.0340758	0.0052945	0.0173298	0.00270993	0.0179956	0.00280839	0.0173298	0.00271463	0.0299863	0.0046646			0.0291846	0.00423891	0.0395603	0.00428031	0.0415941	0.00370206	0.0332914	0.00381494	0.0285807	0.00392631	0.0269459	0.00401188	0.027241	0.00358495	0.0229541	0.00348719	0.0345793	0.00473447	0.0185722	0.00372445	0.0313329	0.00400667	0.0281549	0.004102	0.0369413	0.00418276
Absolute Errs	TRUE	0.02565	0.003822	0.0178896	0.00279978	0.0219084	0.00342302	0.025943	0.00404664	0.0299935	0.00467066	0.03406	0.00529506	0.0179956	0.00281326	0.0186618	0.00291155	0.0179956	0.00281814	0.0340518	0.00528818			0.0287286	0.00423719	0.0385404	0.00429283	0.0400384	0.00373273	0.032701	0.00383182	0.0278309	0.00393941	0.0266156	0.00401074	0.0267172	0.00359401	0.0222455	0.00350794	0.0338743	0.00476528	0.0179369	0.00374414	0.0307361	0.00402253	0.0274873	0.00412214	0.0362456	0.00420633
Symbol Type	1	0.02355	0.003412	0.0178811	0.00279978	0.0218979	0.00342302	0.0259305	0.00404664	0.0299791	0.00467066	0.0340436	0.00529506	0.0186618	0.0029166	0.0193285	0.00301472	0.0186618	0.00292166	IsoLine	IsoLine			0.0282141	0.00422655	0.0373522	0.00429836	0.0381999	0.00375683	0.0320132	0.00384355	0.0269844	0.00394183	0.026243	0.00400135	0.0261069	0.0035981	0.0214201	0.00352216	0.033053	0.00478882	0.0172195	0.00375618	0.030041	0.00403165	0.0267096	0.004136	0.0354351	0.00422231
Inverse Plot	FALSE	0.01796	0.003269	0.0178729	0.00279949	0.0218878	0.00342266	0.0259186	0.00404622	0.0299653	0.00467016	0.0340279	0.0052945	0.0193285	0.00301995	0.0199955	0.0031179	0.0193285	0.00302519					0.0276636	0.00420744	0.0360281	0.00429677	0.0361144	0.00377388	0.0312468	0.0038498	0.0260784	0.00393347	0.0258445	0.00398412	0.0254269	0.00359712	0.0205002	0.00352948	0.0321378	0.00480445	0.0164515	0.00376003	0.0292664	0.00403377	0.025843	0.0041432	0.0345321	0.00423026
Color Plot	TRUE	0.02961	0.004499	0.0178657	0.00279892	0.021879	0.00342197	0.0259081	0.0040454	0.0299531	0.00466922	0.0340141	0.00529343	0.0199955	0.00312332	0.0206631	0.0032211	0.0199955	0.00312873					0.0271011	0.00418072	0.0346042	0.00428809	0.0338226	0.00378356	0.0304227	0.00385042	0.0251523	0.00391468	0.0254376	0.0039598	0.0246957	0.00359109	0.019511	0.0035297	0.0311536	0.00481176	0.0156663	0.00375554	0.0284336	0.00402883	0.0249111	0.00414355	0.0335611	0.00422996
3D plot	FALSE	0.01606	0.003569	0.0178601	0.00279813	0.0218721	0.003421	0.0259	0.00404426	0.0299437	0.00466791	0.0340033	0.00529194	0.0206631	0.00322669	0.021331	0.0033243	0.0206631	0.00323228					0.0265512	0.00414754	0.0331194	0.00427257	0.0313689	0.00378568	0.0295632	0.00384538	0.0242467	0.00388629	0.0250399	0.00392946	0.0239332	0.00358017	0.0184796	0.0035228	0.0301273	0.00481053	0.0148984	0.0037429	0.0275652	0.00401696	0.0239394	0.00413704	0.0325486	0.00422143
Linear	FALSE	0.02713	0.003775	0.0178565	0.00279719	0.0218678	0.00341984	0.0258948	0.00404289	0.0299377	0.00466632	0.0339965	0.00529014	0.021331	0.00333008	0.0219994	0.00342752	0.021331	0.00333585					0.026038	0.00410935	0.0316141	0.00425062	0.0288012	0.00378019	0.028692	0.00383482	0.023401	0.00384954	0.0246688	0.00389443	0.0231603	0.00356467	0.0174339	0.00350898	0.0290869	0.0048008	0.0141812	0.00372265	0.026685	0.0039985	0.0229543	0.00412385	0.0315222	0.00420489
Data Range	J6:N20	0.02345	0.003892	0.0178553	0.00279615	0.0218663	0.00341858	0.025893	0.00404139	0.0299356	0.0046646	0.0339942	0.00528818	0.0219994	0.00343347	0.0226682	0.00353074	0.0219994	0.00343942					0.0255839	0.00406783	0.0301294	0.00422284	0.0261694	0.00376721	0.0278327	0.00381903	0.0226524	0.00380604	0.0243407	0.00385623	0.022398	0.003545	0.0164026	0.00348862	0.0280608	0.00478284	0.0135462	0.00369569	0.0258169	0.00397393	0.0219827	0.00410433	0.03051	0.0041808
Filled Symbols	FALSE	0.03204	0.003928	0.0178565	0.00279512	0.0218678	0.00341732	0.0258948	0.0040399	0.0299377	0.00466287	0.0339965	0.00528623	0.0226682	0.00353688	0.0233375	0.00363398	0.0226682	0.00354301					0.0252087	0.00402478	0.0287059	0.00418999	0.0235248	0.00374698	0.0270088	0.00379843	0.0220335	0.00375768	0.0240698	0.00381653	0.0216672	0.0035217	0.0154138	0.00346226	0.027077	0.00475714	0.013021	0.00366319	0.0249846	0.00394395	0.0210512	0.00407902	0.0295395	0.00414981
ConcAge	FALSE	0.02934	0.003917	0.0178601	0.00279417	0.0218721	0.00341616	0.0259	0.00403853	0.0299437	0.00466129	0.0340033	0.00528443	0.0233375	0.00364029	0.0240072	0.00373723	0.0233375	0.0036466					0.0249289	0.00398209	0.0273823	0.00415297	0.0209188	0.0037199	0.0262427	0.0037736	0.0215713	0.00370659	0.0238679	0.00377707	0.0209877	0.00349541	0.0144945	0.00343063	0.0261622	0.0047244	0.0126286	0.00362658	0.0242108	0.00390935	0.020185	0.00404861	0.0286371	0.00411278
ConcSwap	FALSE	0.03479	0.004	0.0178657	0.00279338	0.021879	0.00341519	0.0259081	0.00403739	0.0299531	0.00465997	0.0340141	0.00528294	0.0240072	0.00374372	0.0246773	0.00384049	0.0240072	0.00375021					0.0247566	0.00394163	0.0261947	0.00411278	0.0184022	0.0036865	0.0255555	0.0037452	0.021286	0.00365498	0.0237439	0.00373958	0.0203781	0.00346685	0.0136696	0.0033946	0.0253415	0.00468551	0.0123862	0.00358745	0.0235167	0.00387109	0.019408	0.00401392	0.0278277	0.0040707
1st Symbol-row	1	IsoLine	IsoLine	0.0178729	0.00279282	0.0218878	0.0034145	0.0259186	0.00403657	0.0299653	0.00465903	0.0340279	0.00528187	0.0246773	0.00384716	0.0253479	0.00394375	0.0246773	0.00385383					0.0246994	0.00390516	0.0251756	0.00407053	0.016024	0.00364742	0.0249657	0.00371402	0.0211902	0.00360513	0.0237033	0.00370569	0.019855	0.00343678	0.0129618	0.00335513	0.0246372	0.00464154	0.0123043	0.00354751	0.0229211	0.0038302	0.0187412	0.00397591	0.0271331	0.00402473
				0.0178811	0.00279252	0.0218979	0.00341414	0.0259305	0.00403615	0.0299791	0.00465854	0.0340436	0.00528131	0.0253479	0.0039506	0.0260189	0.00404703	0.0253479	0.00395745					0.0247598	0.00387428	0.0243528	0.00402737	0.0138303	0.00360343	0.0244895	0.00368089	0.021288	0.00355921	0.0237477	0.00367688	0.0194327	0.00340605	0.0123904	0.00331332	0.0240685	0.00459367	0.0123866	0.00350851	0.0224403	0.00378782	0.0182029	0.00393562	0.0265723	0.00397612
				0.0178896	0.00279252	0.0219084	0.00341414	0.025943	0.00403615	0.0299935	0.00465854	0.03406	0.00528131	0.0260189	0.00405406	0.0266904	0.00415032	0.0260189	0.00406109					0.0249351	0.00385034	0.0237486	0.00398446	0.011864	0.00355538	0.0241399	0.00364674	0.0215751	0.00351921	0.0238752	0.00365441	0.0191227	0.00337547	0.0119708	0.0032703	0.0236511	0.00454322	0.0126295	0.00347216	0.0220875	0.00374508	0.0178076	0.00389413	0.0261607	0.0039262
				0.0178978	0.00279282	0.0219184	0.0034145	0.0259549	0.00403657	0.0300073	0.00465903	0.0340758	0.00528187	0.0266904	0.00415753	0.0273623	0.00425362	0.0266904	0.00416474					0.0252178	0.00383437	0.0233796	0.00394299	0.0101634	0.00350421	0.0239264	0.00361248	0.0220389	0.00348691	0.0240804	0.00363927	0.0189335	0.0033459	0.0117147	0.00322724	0.0233961	0.00449157	0.0130223	0.00344004	0.0218722	0.00370316	0.0175663	0.00385258	0.0259095	0.00387633
				0.017905	0.00279338	0.0219273	0.00341519	0.0259654	0.00403739	0.0300195	0.00465997	0.0340896	0.00528294	0.0273623	0.00426101	0.0280346	0.00435694	0.0273623	0.0042684					0.0255954	0.00382709	0.0232558	0.00390409	0.00876137	0.00345092	0.0238548	0.00357906	0.0226593	0.00346369	0.0243541	0.00363212	0.0188702	0.00331812	0.0116289	0.00318533	0.0233107	0.00444012	0.0135478	0.00341355	0.0218003	0.00366319	0.0174855	0.00381211	0.0258255	0.00382787
				0.0179106	0.00279417	0.0219341	0.00341616	0.0259735	0.00403853	0.0300289	0.00466129	0.0341003	0.00528443	0.0280346	0.0043645	0.0287074	0.00446026	0.0280346	0.00437207					0.0260514	0.00382881	0.0233807	0.0038688	0.00768538	0.00339653	0.0239272	0.00354738	0.0234091	0.00345059	0.0246844	0.00363326	0.0189346	0.00329291	0.0117158	0.00314569	0.0233971	0.00439027	0.0141831	0.00339386	0.0218738	0.00362628	0.0175674	0.00377382	0.025911	0.00378214
				0.0179142	0.00279512	0.0219385	0.00341732	0.0259787	0.0040399	0.0300349	0.00466287	0.0341071	0.00528623	0.0287074	0.00446801	0.0293806	0.00456359	0.0287074	0.00447575					0.0265659	0.00383945	0.0237507	0.00383811	0.00695632	0.00334212	0.0241414	0.0035183	0.0242556	0.00344817	0.025057	0.00364265	0.0191248	0.00327094	0.011973	0.00310942	0.0236529	0.00434339	0.0149005	0.00338182	0.0220906	0.00359343	0.0178097	0.00373875	0.0261637	0.00374039
				0.0179154	0.00279615	0.02194	0.00341858	0.0259805	0.00404139	0.030037	0.0046646	0.0341095	0.00528818	0.0293806	0.00457152	0.0300543	0.00466693	0.0293806	0.00457945					0.0271164	0.00385856	0.0243559	0.00381284	0.00658839	0.00328874	0.0244918	0.00349263	0.0251616	0.00345653	0.0254555	0.00365988	0.0194358	0.00325282	0.0123935	0.0030775	0.0240713	0.00430076	0.0156685	0.00337797	0.022445	0.00356552	0.0182059	0.00370786	0.0265767	0.00370375
				ConcTikEll	ConcTikEll	ConcTikEll	ConcTikEll	ConcTikEll	ConcTikEll	ConcTikEll	ConcTikEll	ConcTikEll	ConcTikEll	0.0300543	0.00467504	0.0307284	0.00477029	0.0300543	0.00468315					0.0276789	0.00388528	0.0251797	0.00379369	0.00658875	0.00323742	0.0249686	0.00347106	0.0260877	0.00347532	0.0258624	0.0036842	0.019859	0.00323905	0.0129659	0.00305081	0.0246407	0.00426353	0.0164537	0.00338246	0.0229271	0.00354333	0.0187451	0.003682	0.0271387	0.00367324
														0.0307284	0.00477857	0.0314029	0.00487365	0.0307284	0.00478686					0.0282288	0.00391846	0.0261996	0.00378117	0.00695739	0.00318918	0.025559	0.00345418	0.0269933	0.00350371	0.0262601	0.00371454	0.0203828	0.00322999	0.0136745	0.00303006	0.0253457	0.00423272	0.0172216	0.0033951	0.0235239	0.00352747	0.0194127	0.00366186	0.0278344	0.00364967
														0.0314029	0.00488212	0.0320779	0.00497702	0.0314029	0.00489059					0.028742	0.00395665	0.0273878	0.00377564	0.00768713	0.00314493	0.0262468	0.00344245	0.027839	0.00354046	0.0266312	0.00374957	0.0209931	0.0032259	0.0144999	0.00301584	0.026167	0.00420918	0.0179388	0.00341535	0.024219	0.00351835	0.0201904	0.003648	0.0286449	0.00363369
														0.0320779	0.00498567	0.0327533	0.00508041	0.0320779	0.00499432					0.0291961	0.00399817	0.0287119	0.00377723	0.00876378	0.00310556	0.0270132	0.0034362	0.0285876	0.00358396	0.0269593	0.00378777	0.0216731	0.00322688	0.0154198	0.00300852	0.0270822	0.00419355	0.0185738	0.00344231	0.0249936	0.00351623	0.021057	0.0036408	0.0295479	0.00362574
														0.0327533	0.00508924	0.0334292	0.00518381	0.0327533	0.00509807					0.0295713	0.00404122	0.0301358	0.00378591	0.0101664	0.00307182	0.0278373	0.00343558	0.0292065	0.00363232	0.0272302	0.00382747	0.0224043	0.00323291	0.016409	0.0030083	0.0280664	0.00418624	0.019099	0.00347481	0.0258264	0.00352117	0.0219889	0.00364045	0.0305189	0.00362604
														0.0334292	0.00519282	0.0341055	0.00528721	0.0334292	0.00520182					0.0298511	0.00408391	0.0316206	0.00380143	0.0118676	0.00304437	0.0286968	0.00344062	0.0296687	0.00368341	0.0274321	0.00386693	0.0231668	0.00324383	0.0174404	0.0030152	0.0290927	0.00418747	0.0194914	0.00351142	0.0266948	0.00353304	0.0229606	0.00364696	0.0315314	0.00363457
														0.0341055	0.0052964	0.0347823	0.00539063	0.0341055	0.00530559					0.0300234	0.00412437	0.0331259	0.00382338	0.0138344	0.00302374	0.029568	0.00345118	0.029954	0.00373502	0.0275561	0.00390442	0.0239397	0.00325933	0.0184861	0.00302902	0.0301331	0.0041972	0.0197338	0.00355055	0.027575	0.0035515	0.0239457	0.00366015	0.0325578	0.00365111
														0.0347823	0.0054	0.0348436	0.0054	0.0347212	0.0054					0.0300806	0.00416084	0.0346106	0.00385116	0.0160284	0.00301034	0.0304273	0.00346697	0.0300498	0.00378487	0.0275967	0.00393831	0.024702	0.003279	0.0195174	0.00304938	0.0311592	0.00421516	0.0198157	0.00359049	0.0284431	0.00357607	0.0249173	0.00367967	0.03357	0.0036752
														0.0347823	0.0054	ConcBand	ConcBand	ConcBand	ConcBand							0.0360341	0.00388401	0.018407	0.00300443	0.0312512	0.00348757					0.0254328	0.0033023	0.0205062	0.00307574	0.032143	0.00424086			0.0292754	0.00360605	0.0258488	0.00370498	0.0345405	0.00370619
														IsoLine	IsoLine											0.0373577	0.00392103	0.0209238	0.00300612	0.0320173	0.0035124					0.0261123	0.00332859	0.0214255	0.00310737	0.0330578	0.0042736			0.0300492	0.00364065	0.026715	0.00373539	0.0354429	0.00374322
																										0.0385453	0.00396122	0.0235299	0.00301538	0.0327045	0.0035408					0.0267219	0.00335715	0.0222504	0.0031434	0.0338785	0.00431249			0.0307433	0.00367891	0.027492	0.00377008	0.0362523	0.0037853
																										0.0395644	0.00400347	0.0261745	0.00303202	0.0332943	0.00357198					0.027245	0.00338722	0.0229582	0.00318287	0.0345828	0.00435646			0.0313389	0.0037198	0.0281588	0.00380809	0.0369469	0.00383127
																										0.0403872	0.00404663	0.0288062	0.00305573	0.0337705	0.00360511					0.0276673	0.00341795	0.0235296	0.00322468	0.0351515	0.00440433			0.0318197	0.00376218	0.0286971	0.00384838	0.0375077	0.00387988
																										0.0409914	0.00408954	0.0313738	0.00308605	0.0341201	0.00363926					0.0279773	0.00344853	0.0239492	0.0032677	0.0355689	0.00445478			0.0321725	0.00380492	0.0290924	0.00388987	0.0379193	0.0039298
																										0.0413604	0.00413101	0.0338272	0.00312238	0.0343336	0.00367352					0.0281665	0.0034781	0.0242053	0.00331076	0.0358239	0.00450643			0.0323878	0.00384684	0.0293337	0.00393142	0.0381705	0.00397967
																										0.0414842	0.00416991	0.0361187	0.00316401	0.0344052	0.00370694					0.0282298	0.00350588	0.0242911	0.00335267	0.0359093	0.00455788			0.0324597	0.00388681	0.0294145	0.00397189	0.0382545	0.00402813
																												0.0382037	0.00321015
																												0.0400417	0.00325987
																												0.0415968	0.00331223
																												0.0428388	0.0033662
																												0.0437436	0.00342073
																												0.0442934	0.00347476
																												0.0444776	0.00352724
[truncated: 4 more columns]

## Sheet: PlotDat7
Source sheet	Behr corrected	0.2	24.1829	1	21.04	2.218	0.85	18.822
Plot name	Average7	15.8	24.1829	2	21.85	3.316	1.15	18.822
Plot Type	15			3	21.96	1.5804	1.15	23.258
1st free col	8			4	22.97	1.6206	0.85	23.258
Sigma Level	1			5	23.44	1.7628	0.85	18.822
Absolute Errs	TRUE			6	23.77	2.096	ErrBox	ErrBox
Symbol Type	1			7	24.29	2.196	1.85	18.534
Inverse Plot	FALSE			8	24.59	1.6144	2.15	18.534
Color Plot	TRUE			9	25.04	2.138	2.15	25.166
3D plot	FALSE			10	25.2	1.7968	1.85	25.166
Linear	FALSE			11	25.27	2.57	1.85	18.534
Data Range	C6:D20			12	25.73	4.574	ErrBox	ErrBox
Filled Symbols	TRUE			13	25.95	1.7486	2.85	20.3796
ConcAge	FALSE			14	25.97	2.218	3.15	20.3796
ConcSwap	FALSE			15	28.94	2.654	3.15	23.5404
1st Symbol-row	1			IsoLine	IsoLine	IsoLine	2.85	23.5404
							2.85	20.3796
							ErrBox	ErrBox
							3.85	21.3494
							4.15	21.3494
							4.15	24.5906
							3.85	24.5906
							3.85	21.3494
							ErrBox	ErrBox
							4.85	21.6772
							5.15	21.6772
							5.15	25.2028
							4.85	25.2028
							4.85	21.6772
							ErrBox	ErrBox
							5.85	21.674
							6.15	21.674
							6.15	25.866
							5.85	25.866
							5.85	21.674
							ErrBox	ErrBox
							6.85	22.094
							7.15	22.094
							7.15	26.486
							6.85	26.486
							6.85	22.094
							ErrBox	ErrBox
							7.85	22.9756
							8.15	22.9756
							8.15	26.2044
							7.85	26.2044
							7.85	22.9756
							ErrBox	ErrBox
							8.85	22.902
							9.15	22.902
							9.15	27.178
							8.85	27.178
							8.85	22.902
							ErrBox	ErrBox
							9.85	23.4032
							10.15	23.4032
							10.15	26.9968
							9.85	26.9968
							9.85	23.4032
							ErrBox	ErrBox
							10.85	22.7
							11.15	22.7
							11.15	27.84
							10.85	27.84
							10.85	22.7
							ErrBox	ErrBox
							11.85	21.156
							12.15	21.156
							12.15	30.304
							11.85	30.304
							11.85	21.156
							ErrBox	ErrBox
							12.85	24.2014
							13.15	24.2014
							13.15	27.6986
							12.85	27.6986
							12.85	24.2014
							ErrBox	ErrBox
							13.85	23.752
							14.15	23.752
							14.15	28.188
							13.85	28.188
							13.85	23.752
							ErrBox	ErrBox
							14.85	26.286
							15.15	26.286
							15.15	31.594
							14.85	31.594
							14.85	26.286
							ErrBox	ErrBox

## Sheet: PlotDat10
Source sheet	Behr corrected	0.2	21.3696	1	16.06	3.352	0.85	12.708
Plot name	Average10	12.8	21.3696	2	17.64	2.19	1.15	12.708
Plot Type	15			3	20.54	2.194	1.15	19.412
1st free col	8			4	20.65	2.626	0.85	19.412
Sigma Level	1			5	20.85	2.794	0.85	12.708
Absolute Errs	TRUE			6	20.87	1.7938	ErrBox	ErrBox
Symbol Type	1			7	20.95	2.486	1.85	15.45
Inverse Plot	FALSE			8	22.68	2.432	2.15	15.45
Color Plot	TRUE			9	26.03	2.874	2.15	19.83
3D plot	FALSE			10	26.62	3.024	1.85	19.83
Linear	FALSE			11	28.11	3.95	1.85	15.45
Data Range	C39:D50			12	29.97	18.676	ErrBox	ErrBox
Filled Symbols	TRUE			IsoLine	IsoLine	IsoLine	2.85	18.346
ConcAge	FALSE						3.15	18.346
ConcSwap	FALSE						3.15	22.734
1st Symbol-row	1						2.85	22.734
							2.85	18.346
							ErrBox	ErrBox
							3.85	18.024
							4.15	18.024
							4.15	23.276
							3.85	23.276
							3.85	18.024
							ErrBox	ErrBox
							4.85	18.056
							5.15	18.056
							5.15	23.644
							4.85	23.644
							4.85	18.056
							ErrBox	ErrBox
							5.85	19.0762
							6.15	19.0762
							6.15	22.6638
							5.85	22.6638
							5.85	19.0762
							ErrBox	ErrBox
							6.85	18.464
							7.15	18.464
							7.15	23.436
							6.85	23.436
							6.85	18.464
							ErrBox	ErrBox
							7.85	20.248
							8.15	20.248
							8.15	25.112
							7.85	25.112
							7.85	20.248
							ErrBox	ErrBox
							8.85	23.156
							9.15	23.156
							9.15	28.904
							8.85	28.904
							8.85	23.156
							ErrBox	ErrBox
							9.85	23.596
							10.15	23.596
							10.15	29.644
							9.85	29.644
							9.85	23.596
							ErrBox	ErrBox
							10.85	24.16
							11.15	24.16
							11.15	32.06
							10.85	32.06
							10.85	24.16
							ErrBox	ErrBox
							11.85	11.294
							12.15	11.294
							12.15	48.646
							11.85	48.646
							11.85	11.294
							ErrBox	ErrBox

## Sheet: PlotDat12
Source sheet	Behr corrected	0.03397	0.007284	0.0402484	0.00622429	0.0505612	0.00778641	0.0609761	0.00935095	0.0714943	0.0109179	0.0821168	0.0124873	0.0928446	0.0140592	0.103679	0.0156334	0.0321713	0.005	0.032228	0.005	0.0321149	0.005	0.0299863	0.0046646	0.00121381	0.005	0.0683608	0.00751165	0.119491	0.00990472	0.159443	0.00978894	0.0705603	0.00972053	0.12394	0.0104561	0.13433	0.0105827	0.105288	0.0103911	0.230268	0.0117136	0.1047	0.011229	0.0942989	0.0114106	0.140976	0.0122291
Plot name	Concordia12	0.07739	0.009294	0.0402457	0.00622659	0.0505577	0.00778929	0.0609719	0.00935442	0.0714893	0.010922	0.0821111	0.012492	0.0928381	0.0140644	0.103671	0.0156393	0.0321713	0.005	0.0346341	0.00536799	0.0321713	0.00500867	0.0401802	0.00622429	0.149677	0.016	0.067891	0.0076279	0.119078	0.0101091	0.158458	0.010084	0.0703347	0.00990426	0.123433	0.0106727	0.133726	0.0107677	0.104978	0.0105436	0.22972	0.0119341	0.104386	0.0113937	0.0939827	0.0116052	0.140676	0.0125252
Plot Type	1	0.0584	0.00932	0.0402376	0.00622871	0.0505475	0.00779194	0.0609596	0.0093576	0.0714748	0.0109257	0.0820943	0.0124962	0.092819	0.0140692	0.10365	0.0156446	0.0346341	0.00537732	0.0371027	0.0057448	0.0346341	0.00538665	0.0504751	0.00778641			0.0664959	0.00773477	0.117854	0.0102976	0.155526	0.0103643	0.0696684	0.0100777	0.121929	0.0108721	0.131931	0.0109356	0.104057	0.0106864	0.228085	0.012143	0.103464	0.0115361	0.0930541	0.0117773	0.139787	0.01281
1st free col	53	0.05418	0.009526	0.0402249	0.00623047	0.0505314	0.00779414	0.0609401	0.00936025	0.0714519	0.0109288	0.0820678	0.0124998	0.092789	0.0140732	0.103616	0.015649	0.0371027	0.00575478	0.0395772	0.00612174	0.0371027	0.00576477	0.0608718	0.00935095			0.0642136	0.00782934	0.115842	0.0104666	0.150703	0.0106242	0.0685797	0.010236	0.119456	0.0110505	0.128978	0.011083	0.102543	0.0108169	0.225377	0.0123385	0.101959	0.0116525	0.0915384	0.0119222	0.138317	0.013081
Sigma Level	1	0.07217	0.009794	0.0402086	0.00623173	0.0505108	0.00779572	0.0609151	0.00936214	0.0714225	0.010931	0.0820339	0.0125023	0.0927504	0.014076	0.103573	0.0156522	0.0395772	0.00613239	0.0420576	0.00649883	0.0395772	0.00614303	0.0713714	0.0109179			0.0611063	0.00790903	0.113082	0.0106127	0.144084	0.0108587	0.0670981	0.010375	0.116062	0.0112045	0.124927	0.0112071	0.100465	0.0109324	0.221619	0.0125189	0.0999115	0.0117396	0.0894769	0.012036	0.136279	0.0133358
Absolute Errs	TRUE	0.0725	0.009886	0.0401899	0.00623238	0.0504873	0.00779654	0.0608866	0.00936313	0.0713889	0.0109321	0.0819951	0.0125036	0.0927063	0.0140775	0.103524	0.0156539	0.0420576	0.00651013	0.044544	0.00687606	0.0420576	0.00652143	0.0819749	0.0124873			0.0572588	0.00797168	0.109627	0.0107332	0.135797	0.0110633	0.0652642	0.0104909	0.111815	0.011331	0.119855	0.0113056	0.0978646	0.0110307	0.216843	0.0126826	0.0973776	0.0117951	0.0869258	0.0121155	0.133689	0.0135723
Symbol Type	1	0.07359	0.01005	0.0401705	0.00623238	0.0504628	0.00779654	0.0608569	0.00936313	0.0713539	0.0109321	0.0819547	0.0125036	0.0926605	0.0140775	0.103472	0.0156539	0.044544	0.00688802	0.0470362	0.00725343	0.044544	0.00689998	0.0926834	0.0140592			0.052776	0.00801557	0.105545	0.0108257	0.126004	0.0112339	0.0631279	0.0105804	0.106796	0.0114276	0.113861	0.0113764	0.0947914	0.01111	0.211089	0.0128284	0.0944264	0.0118174	0.0839548	0.0121585	0.130571	0.0137885
Inverse Plot	FALSE	0.1023	0.01057	0.0401519	0.00623173	0.0504393	0.00779572	0.0608284	0.00936214	0.0713203	0.010931	0.081916	0.0125023	0.0926164	0.014076	0.103423	0.0156522	0.0470362	0.00726605	0.0495345	0.00763094	0.0470362	0.00727867	0.103498	0.0156334			0.0477802	0.0080395	0.100915	0.0108884	0.114894	0.0113673	0.0607476	0.0106412	0.101102	0.0114924	0.107062	0.0114182	0.0913055	0.0111686	0.204408	0.0129548	0.0911385	0.011806	0.0806449	0.012164	0.12695	0.0139825
Color Plot	TRUE	0.08208	0.01058	0.0401356	0.00623047	0.0504187	0.00779414	0.0608034	0.00936025	0.0712909	0.0109288	0.081882	0.0124998	0.0925778	0.0140732	0.103379	0.015649	0.0495345	0.00764422	0.0520386	0.00800859	0.0495345	0.0076575	IsoLine	IsoLine			0.0424078	0.00804283	0.0958263	0.01092	0.102685	0.0114609	0.0581881	0.0106715	0.094846	0.0115242	0.0995906	0.0114301	0.0874748	0.0112055	0.196855	0.013061	0.0876035	0.0117611	0.0770863	0.0121317	0.122857	0.0141527
3D plot	FALSE	0.07153	0.01078	0.0401229	0.00622871	0.0504026	0.00779194	0.060784	0.0093576	0.071268	0.0109257	0.0818556	0.0124962	0.0925478	0.0140692	0.103346	0.0156446	0.0520386	0.00802253	0.0545488	0.00838639	0.0520386	0.00803647					0.0368052	0.00802545	0.0903791	0.01092	0.0896145	0.0115128	0.0555193	0.0106706	0.0881483	0.0115223	0.0915918	0.011412	0.0833739	0.0112198	0.188495	0.0131458	0.0839178	0.011684	0.0733762	0.0120626	0.118328	0.0142976
Linear	FALSE	0.07168	0.01119	0.0401148	0.00622659	0.0503924	0.00778929	0.0607717	0.00935442	0.0712534	0.010922	0.0818388	0.012492	0.0925287	0.0140644	0.103324	0.0156393	0.0545488	0.00840099	0.0570649	0.00876433	0.0545488	0.00841559					0.0311252	0.00798785	0.0846792	0.0108883	0.0759361	0.011522	0.0528139	0.0106385	0.0811396	0.0114867	0.0832214	0.0113642	0.0790825	0.0112114	0.179401	0.0132087	0.0801819	0.0115768	0.0696157	0.0119584	0.113401	0.014416
Data Range	J29:N40	0.09752	0.01215	0.040112	0.00622429	0.050389	0.00778641	0.0607674	0.00935095	0.0712485	0.0109179	0.081833	0.0124873	0.0925222	0.0140592	0.103317	0.0156334	0.0570649	0.00877958	0.0595871	0.0091424	0.0570649	0.00879484					0.0255229	0.00793106	0.0788374	0.0108256	0.0619164	0.0114883	0.0501458	0.010576	0.0739563	0.0114182	0.0746423	0.0112877	0.0746842	0.0111804	0.169648	0.0132491	0.0764979	0.0114424	0.0659074	0.0118221	0.108118	0.0145069
Filled Symbols	FALSE	IsoLine	IsoLine	0.0401148	0.00622199	0.0503924	0.00778352	0.0607717	0.00934748	0.0712534	0.0109139	0.0818388	0.0124827	0.0925287	0.0140539	0.103324	0.0156276	0.0595871	0.00915832	0.0621152	0.00952062	0.0595871	0.00917424					0.020151	0.00785661	0.0729674	0.0107331	0.0478282	0.0114124	0.0475878	0.0104849	0.0667382	0.0113181	0.0660216	0.0111838	0.0702646	0.0111274	0.159321	0.0132666	0.0729661	0.0112845	0.0623525	0.0116574	0.102524	0.0145694
ConcAge	FALSE			0.0401229	0.00621987	0.0504026	0.00778087	0.060784	0.0093443	0.071268	0.0109101	0.0818556	0.0124784	0.0925478	0.0140491	0.103346	0.0156223	0.0621152	0.00953721	0.0646494	0.00989899	0.0621152	0.00955379					0.015156	0.00776654	0.0671835	0.0106126	0.0339458	0.0112958	0.0452096	0.0103676	0.0596259	0.0111883	0.0575269	0.0110547	0.0659098	0.0110534	0.148507	0.0132611	0.0696829	0.0111074	0.059048	0.0114687	0.0966669	0.0146032
ConcSwap	FALSE			0.0401356	0.00621811	0.0504187	0.00777867	0.0608034	0.00934165	0.0712909	0.0109071	0.081882	0.0124749	0.0925778	0.0140452	0.103379	0.0156179	0.0646494	0.00991623	0.0671897	0.0102775	0.0646494	0.00993347					0.0106742	0.00766331	0.0615983	0.0104664	0.0205394	0.0111408	0.043076	0.0102274	0.0527577	0.0110314	0.0493236	0.0109029	0.0617044	0.0109599	0.137299	0.0132327	0.0667379	0.0109159	0.0560839	0.0112613	0.0905967	0.0146078
1st Symbol-row	1			0.0401519	0.00621685	0.0504393	0.0077771	0.0608284	0.00933976	0.0713203	0.0109048	0.081916	0.0124724	0.0926164	0.0140423	0.103423	0.0156147	0.0671897	0.0102954	0.069736	0.0106561	0.0671897	0.0103133					0.00682784	0.00754973	0.0563204	0.0102974	0.00786985	0.0109503	0.0412454	0.010068	0.0462673	0.0108504	0.0415715	0.0107312	0.0577304	0.0108487	0.125793	0.0131815	0.0642114	0.0107152	0.0535411	0.0110407	0.084365	0.0145833
				0.0401705	0.0062162	0.0504628	0.00777628	0.0608569	0.00933877	0.0713539	0.0109037	0.0819547	0.012471	0.0926605	0.0140408	0.103472	0.015613	0.069736	0.0106747	0.0722884	0.0110349	0.069736	0.0106933					0.00372187	0.00742891	0.0514526	0.0101089	-0.00381615	0.0107281	0.0397675	0.00989387	0.0402812	0.0106488	0.0344214	0.0105431	0.0540651	0.0107219	0.114086	0.0131081	0.0621723	0.0105108	0.0514891	0.0108131	0.0780252	0.0145298
				0.0401899	0.0062162	0.0504873	0.00777628	0.0608866	0.00933877	0.0713889	0.0109037	0.0819951	0.012471	0.0927063	0.0140408	0.103524	0.015613	0.0722884	0.0110542	0.0748468	0.0114138	0.0722884	0.0110734					0.00144099	0.00730413	0.0470897	0.00990447	-0.0142912	0.0104784	0.0386828	0.00970969	0.0349157	0.0104306	0.0280124	0.0103422	0.0507798	0.0105821	0.102278	0.013013	0.0606762	0.0103084	0.0499837	0.0105845	0.0716311	0.0144478
				0.0402086	0.00621685	0.0505108	0.0077771	0.0609151	0.00933976	0.0714225	0.0109048	0.0820339	0.0124724	0.0927504	0.0140423	0.103573	0.0156147	0.0748468	0.0114337	0.0774114	0.0117929	0.0748468	0.0114536					4.74136e-05	0.0071788	0.0433165	0.00968819	-0.0233514	0.0102063	0.0380209	0.00952051	0.0302753	0.0102	0.0224693	0.0101325	0.0479384	0.0104319	0.0904708	0.0128971	0.0597639	0.0101133	0.049066	0.0103612	0.0652376	0.014338
				0.0402249	0.00621811	0.0505314	0.00777867	0.0609401	0.00934165	0.0714519	0.0109071	0.0820678	0.0124749	0.092789	0.0140452	0.103616	0.0156179	0.0774114	0.0118135	0.0799821	0.0121721	0.0774114	0.011834					-0.000420843	0.00705635	0.0402065	0.00946424	-0.0308204	0.00991683	0.0377997	0.00933147	0.0264503	0.00996149	0.0179	0.00991791	0.0455964	0.0102742	0.0787644	0.0127613	0.0594604	0.00993096	0.0487611	0.0101494	0.0588989	0.0142014
				0.0402376	0.00621987	0.0505475	0.00778087	0.0609596	0.0093443	0.0714748	0.0109101	0.0820943	0.0124784	0.092819	0.0140491	0.10365	0.0156223	0.0799821	0.0121934	0.0825589	0.0125515	0.0799821	0.0122146					4.89937e-05	0.0069401	0.0378203	0.00923698	-0.0365528	0.00961579	0.0380253	0.00914774	0.0235153	0.00971973	0.0143934	0.00970273	0.0437992	0.0101122	0.0672588	0.0126068	0.0597739	0.00976633	0.0490773	0.00995479	0.0526693	0.0140391
				0.0402457	0.00622199	0.0505577	0.00778352	0.0609719	0.00934748	0.0714893	0.0109139	0.0821111	0.0124827	0.0928381	0.0140539	0.103671	0.0156276	0.0825589	0.0125734	0.0851419	0.012931	0.0825589	0.0125953					0.00144411	0.00683323	0.0362042	0.00901083	-0.040437	0.00930899	0.0386916	0.00897432	0.0215272	0.00947942	0.0120178	0.00949111	0.0425819	0.00994901	0.0560522	0.0124349	0.0606958	0.00962389	0.0500059	0.00978267	0.046602	0.0138524
				0.0402484	0.00622429	0.0505612	0.00778641	0.0609761	0.00935095	0.0714943	0.0109179	0.0821168	0.0124873	0.0928446	0.0140592	0.103679	0.0156334	0.0851419	0.0129535	0.087731	0.0133106	0.0851419	0.0129761					0.00372644	0.00673866	0.0353898	0.00879019	-0.0423976	0.0090024	0.0397803	0.00881596	0.0205248	0.00924523	0.0108194	0.00928717	0.0419681	0.00978777	0.0452401	0.0122472	0.062201	0.00950753	0.0515216	0.00963776	0.0407485	0.0136431
				ConcTikEll	ConcTikEll	ConcTikEll	ConcTikEll	ConcTikEll	ConcTikEll	ConcTikEll	ConcTikEll	ConcTikEll	ConcTikEll	ConcTikEll	ConcTikEll	ConcTikEll	ConcTikEll	0.087731	0.0133339	0.0903264	0.0136904	0.087731	0.0133571					0.00683374	0.00665897	0.0353928	0.00857935	-0.0423962	0.008702	0.0412619	0.00867696	0.0205277	0.00902172	0.0108216	0.00909489	0.0419697	0.00963162	0.0349149	0.0120451	0.0642485	0.00942042	0.0535831	0.00952401	0.035159	0.0134128
																		0.0903264	0.0137143	0.0929279	0.0140703	0.0903264	0.0137382					0.0106812	0.00659632	0.0362133	0.00838243	-0.0404329	0.00841362	0.0430958	0.00856112	0.0215357	0.00881325	0.0120243	0.00891801	0.0425869	0.00948363	0.0251645	0.0118304	0.0667824	0.00936495	0.0561342	0.00944452	0.029881	0.0131636
																		0.0929279	0.0140949	0.0955356	0.0144504	0.0929279	0.0141195					0.015164	0.00655243	0.0378353	0.00820325	-0.0365459	0.00814289	0.0452321	0.00847161	0.0235293	0.00862386	0.014404	0.00875997	0.0438074	0.00934665	0.0160722	0.011605	0.0697336	0.00934262	0.0591052	0.00940145	0.0249597	0.0128975
																		0.0955356	0.0144756	0.0981495	0.0148306	0.0955356	0.0145009					0.0201598	0.0065285	0.0402271	0.0080453	-0.030811	0.00789507	0.0476124	0.00841085	0.0264696	0.00845725	0.0179146	0.00862385	0.0456077	0.00922337	0.00771565	0.0113707	0.0730215	0.00935404	0.0624151	0.00939599	0.020437	0.0126169
																		0.0981495	0.0148565	0.10077	0.015211	0.0981495	0.0148824					0.0255322	0.00652517	0.0433423	0.00791165	-0.0233396	0.00767498	0.0501719	0.00838051	0.0302994	0.00831666	0.0224875	0.00851229	0.0479526	0.00911617	0.000166013	0.0111296	0.0765565	0.0093989	0.0659737	0.00942829	0.0163514	0.0123241
																		0.10077	0.0152375	0.103396	0.0155915	0.10077	0.0152641					0.0311348	0.00654255	0.0471201	0.00780491	-0.0142773	0.00748691	0.0528407	0.00838142	0.0349441	0.00820482	0.0280339	0.00842747	0.0507965	0.00902715	-0.00651225	0.0108838	0.0802422	0.00947598	0.0696838	0.00949745	0.0127379	0.0120216
																		0.103396	0.0156187	0.106029	0.0159721	0.103396	0.0156459					0.0368148	0.00658015	0.0514872	0.00772715	-0.0038004	0.00733452	0.0555461	0.00841355	0.0403134	0.00812391	0.0344458	0.00837104	0.0540841	0.00895804	-0.0122622	0.0106352	0.0839781	0.00958318	0.0734443	0.0096016	0.00962726	0.011712
																		0.106029	0.016	0.106222	0.016	0.105836	0.016					0.0424171	0.00663694	0.0563584	0.00767989	0.00788716	0.00722077	0.0582142	0.00847602	0.0463028	0.00807551	0.0415984	0.0083441	0.0577513	0.00891019	-0.0170347	0.0103862	0.0876621	0.00971756	0.0771526	0.00973789	0.00704604	0.0113979
																		0.106029	0.016	ConcBand	ConcBand	ConcBand	ConcBand					0.047789	0.00671139	0.0616389	0.00766405	0.0205579	0.00714789	0.0607722	0.00856713	0.0527957	0.00806056	0.0493524	0.00834717	0.0617268	0.00888452	-0.0207891	0.0101386	0.0911939	0.00987547	0.0807075	0.0099026	0.00501625	0.0110821
																		IsoLine	IsoLine									0.052784	0.00680146	0.0672261	0.00767993	0.0339652	0.00711728	0.0631504	0.0086844	0.0596656	0.00807935	0.057557	0.00838019	0.0659332	0.00888153	-0.0234933	0.00989479	0.0944771	0.0100526	0.084012	0.0100913	0.00355522	0.0107672
																												0.0572658	0.00690469	0.073011	0.00772722	0.0478481	0.00712954	0.065284	0.00882463	0.066779	0.00813151	0.0660524	0.00844252	0.0702886	0.00890129	-0.0251243	0.00965671	0.0974221	0.0102441	0.0869761	0.0102987	0.0026754	0.0104559
																												0.0611122	0.00701827	0.0788812	0.00780502	0.0619363	0.00718444	0.0671146	0.00898399	0.0739972	0.00821603	0.0746734	0.00853294	0.0747083	0.0089434	-0.0256682	0.00942642	0.0999486	0.0104448	0.0895189	0.0105193	0.0023843	0.0101509
																												0.0642181	0.00713909	0.0847224	0.00791179	0.0759558	0.00728091	0.0685925	0.00915813	0.0811799	0.00833126	0.083252	0.0086497	0.0791062	0.00900705	-0.0251203	0.00920588	0.101988	0.0106492	0.0915709	0.0107469	0.00268442	0.00985475
																												0.066499	0.00726387	0.0904208	0.00804547	0.0896335	0.00741706	0.0696772	0.00934231	0.0881872	0.00847497	0.0916213	0.00879052	0.0833968	0.00909101	-0.0234853	0.00899699	0.103484	0.0108516	0.0930763	0.0109755	0.00357317	0.00956998
																												0.0678926	0.0073892	0.0958657	0.00820345	0.102703	0.00759026	0.0703391	0.00953149	0.0948828	0.00864434	0.0996185	0.00895267	0.0874965	0.00919363	-0.0207771	0.00880151	0.104396	0.0110467	0.093994	0.0111988	0.00504299	0.00929904
																												0.0683608	0.00751165	0.100951	0.00838265	0.114911	0.00779712	0.0705603	0.00972053	0.101136	0.0088361	0.107088	0.00913298	0.0913255	0.00931291	-0.0170189	0.00862113	0.1047	0.011229	0.0942989	0.0114106	0.00708134	0.00904422
																														0.105578	0.0085796	0.126018	0.00803362			0.106826	0.0090465	0.113884	0.00932795	0.0948093	0.00944655	-0.0122427	0.00845737					0.00967081	0.00880772
																														0.109656	0.00879044	0.13581	0.00829516			0.111841	0.00927144	0.119875	0.00953378	0.0978801	0.00959193	-0.00648927	0.00831163					0.0127893	0.00859153
																														0.113105	0.00901109	0.144095	0.00857664			0.116084	0.00950656	0.124943	0.00974646	0.100478	0.00974622	0.000192327	0.00818516					0.0164103	0.00839752
																														0.11586	0.00923725	0.150711	0.0088726			0.119472	0.00974728	0.128991	0.00996186	0.102553	0.00990643	0.00774507	0.00807904					0.0205028	0.00822733
																														0.117866	0.00946451	0.155532	0.00917726			0.12194	0.0099889	0.131939	0.0101758	0.104064	0.0100694	0.0161045	0.00799417					0.0250319	0.00808242
																														0.119085	0.00968845	0.158461	0.00948471			0.123439	0.0102267	0.133731	0.0103841	0.104982	0.0102321	0.0251994	0.00793128					0.029959	0.00796402
																														0.119491	0.00990472	0.159443	0.00978894			0.12394	0.0104561	0.13433	0.0105827	0.105288	0.0103911	0.034952	0.0078909					0.0352421	0.00787315
																																										0.0452792	0.00787337					0.040836	0.00781057
																																										0.0560929	0.00787886					0.0466931	0.00777683
																																										0.0673008	0.0079073					0.0527633	0.0077722
																																										0.0788074	0.00795846					0.058995	0.00779673
																																										0.0905143	0.0080319					0.0653348	0.00785022
																																										0.102322	0.00812699					0.0717289	0.0079322
																																										0.114129	0.00824293					0.0781224	0.00804197
																																										0.125836	0.00837872					0.0844611	0.0081786
																																										0.137341	0.00853321					0.0906907	0.00834092
																																										0.148548	0.00870507					0.096758	0.00852755
																																										0.15936	0.00889285					0.102611	0.0087369
																																										0.169685	0.00909493					0.108201	0.00896717
																																										0.179435	0.0093096					0.113479	0.00921641
																																										0.188528	0.00953502					0.1184	0.00948248
																																										0.196884	0.00976927					0.122923	0.00976313
																																										0.204434	0.0100104					0.127009	0.0100559
																																										0.211112	0.0102562					0.130622	0.0103584
																																										0.216862	0.0105048					0.133733	0.010668
																																										0.221635	0.0107538					0.136314	0.0109821
																																										0.225389	0.0110014					0.138344	0.0112979
																																										0.228093	0.0112452					0.139805	0.0116128
																																										0.229724	0.0114833					0.140685	0.0119241
																																										0.230268	0.0117136					0.140976	0.0122291
[truncated: 2 more columns]

## Sheet: PlotDat13
Source sheet	Behr corrected	-0.005543	0.002494	0.218107	0.0315113	0.483784	0.0640155	0.807407	0.097544	1.20161	0.132129	1.6818	0.167804	2.26672	0.204603	2.97921	0.242562	3.84709	0.281716	4.90427	0.322105	0	0	0	0	0	0	0.217708	0.0315113	0	0.00380511	0.0599587	0.00289489	0.043122	0.00291415	0.0525376	0.00342174	0.066006	0.00341901	0.0703847	0.00349005	0.025773	0.00337138	0.0582606	0.0034904	0.0630074	0.00381879	0.0599982	0.00430955
Plot name	Concordia13	0.02202	0.00274	0.218091	0.0315231	0.483744	0.0640399	0.807335	0.0975817	1.2015	0.132181	1.68162	0.167871	2.26646	0.204686	2.97884	0.242661	3.84658	0.281834	4.90357	0.322241	0.0666734	0.0102184	0.0666734	0.0102006	0.0666734	0.0102362	0.482812	0.0640155	5.15966	0.4	0.0573046	0.00301853	0.0422664	0.00301387	0.0516403	0.00351076	0.0642901	0.00353819	0.0689411	0.00361207	0.0252086	0.00345539	0.0571412	0.00359666	0.0614172	0.00390784	0.0588171	0.00443398
Plot Type	1	0.03041	0.003192	0.218043	0.0315339	0.48363	0.0640623	0.807125	0.0976164	1.20116	0.132229	1.6811	0.167932	2.2657	0.204762	2.97776	0.242753	3.84508	0.281941	4.90152	0.322366	0.137792	0.0205412	0.137792	0.0205053	0.137792	0.0205771	0.805631	0.097544			0.0495589	0.00309967	0.0397705	0.00309141	0.049023	0.00357395	0.0592825	0.00363062	0.0647292	0.00370387	0.0235628	0.0035222	0.0538756	0.00367524	0.0567771	0.00396587	0.0553718	0.0045269
1st free col	79	0.02366	0.003208	0.217969	0.031543	0.483448	0.0640809	0.806794	0.0976451	1.20062	0.132268	1.68028	0.167983	2.2645	0.204825	2.97606	0.242829	3.84272	0.282031	4.89828	0.32247	0.213653	0.0309695	0.213653	0.0309151	0.213653	0.0310239	1.19873	0.132129			0.0373492	0.00313174	0.0358365	0.00314047	0.0448978	0.0036062	0.051389	0.00368882	0.0580902	0.003758	0.0209689	0.00356639	0.0487284	0.00371977	0.049463	0.00398819	0.0499416	0.00458077
Sigma Level	1	0.03477	0.003239	0.217873	0.0315494	0.483215	0.0640942	0.806369	0.0976657	1.19993	0.132296	1.67923	0.16802	2.26297	0.20487	2.97388	0.242883	3.83968	0.282095	4.89412	0.322545	0.294571	0.0415044	0.294571	0.0414311	0.294571	0.0415777	1.67741	0.167804			0.0216646	0.00311215	0.0307833	0.00315709	0.0395989	0.0036049	0.0412491	0.00370806	0.0495619	0.00377009	0.017637	0.00358439	0.0421167	0.00372665	0.0400674	0.00397298	0.0429663	0.00459124
Absolute Errs	TRUE	0.01186	0.003243	0.217764	0.0315528	0.48295	0.0641011	0.805884	0.0976765	1.19914	0.132311	1.67803	0.168039	2.26122	0.204894	2.97139	0.242911	3.83622	0.282129	4.88937	0.322583	0.380885	0.0521469	0.380885	0.0520543	0.380885	0.0522394	2.2603	0.204603			0.00377586	0.00304248	0.02502	0.00313993	0.0335555	0.00357014	0.0296842	0.00368679	0.0398352	0.00373915	0.0138371	0.00357472	0.0345759	0.00369532	0.0293514	0.00392147	0.0350111	0.00455746
Symbol Type	1	0.03065	0.003255	0.217651	0.0315528	0.482673	0.0641011	0.805378	0.0976765	1.19832	0.132311	1.67679	0.168039	2.25939	0.204894	2.9688	0.242911	3.83261	0.282129	4.88443	0.322583	0.472953	0.0628981	0.472953	0.0627859	0.472953	0.0630103	2.97009	0.242562			-0.0148679	0.00292837	0.0190138	0.00309036	0.0272573	0.00350475	0.0176313	0.00362673	0.0296982	0.00366769	0.00987708	0.00353818	0.0267171	0.00362831	0.0181833	0.00383785	0.0267203	0.00448216
Inverse Plot	FALSE	0.02377	0.003525	0.217542	0.0315494	0.482408	0.0640942	0.804893	0.0976657	1.19753	0.132296	1.67559	0.16802	2.25764	0.20487	2.96631	0.242883	3.82915	0.282095	4.87969	0.322545	0.57116	0.0737593	0.57116	0.073627	0.57116	0.0738915	3.83441	0.281716			-0.0327562	0.00277907	0.0132511	0.0030124	0.0212146	0.00341403	0.00606677	0.00353275	0.0199721	0.0035615	0.00607768	0.00347773	0.019177	0.00353107	0.00746776	0.00372888	0.0187658	0.00437144
Color Plot	TRUE	0.03087	0.004045	0.217446	0.031543	0.482175	0.0640809	0.804468	0.0976451	1.19684	0.132268	1.67454	0.167983	2.2561	0.204825	2.96413	0.242829	3.82611	0.282031	4.87553	0.32247	0.675914	0.0847314	0.675914	0.0845787	0.675914	0.084884	4.8869	0.322105			-0.0484398	0.00260668	0.00819875	0.00291238	0.0159167	0.00330531	-0.00407245	0.00341246	0.0114448	0.00342919	0.00274672	0.00339826	0.0125663	0.00341145	-0.00192705	0.0036034	0.0117918	0.00423428
3D plot	FALSE	0.2691	0.004138	0.217372	0.0315339	0.481994	0.0640623	0.804137	0.0976164	1.1963	0.132229	1.67372	0.167932	2.25491	0.204762	2.96243	0.242753	3.82375	0.281941	4.87229	0.322366	0.787653	0.0958156	0.787653	0.0956421	0.787653	0.0959891	IsoLine	IsoLine			-0.0606482	0.00242516	0.00426616	0.0027984	0.0117931	0.00318742	-0.011965	0.00327561	0.00480721	0.00328147	0.000154066	0.00330621	0.0074206	0.00327917	-0.00924004	0.00347156	0.00636345	0.00408178
Linear	FALSE	0.03143	0.004371	0.217324	0.0315231	0.481879	0.0640399	0.803927	0.0975817	1.19596	0.132181	1.6732	0.167871	2.25415	0.204686	2.96135	0.242661	3.82225	0.281834	4.87024	0.322241	0.906842	0.107013	0.906842	0.106818	0.906842	0.107208					-0.0683923	0.00224922	0.00177187	0.00267968	0.00917767	0.00306989	-0.0169713	0.00313327	0.000596998	0.0031303	-0.00149024	0.00320904	0.00415685	0.00314492	-0.0138787	0.00334405	0.00292048	0.00392631
Data Range	J42:N64	0.02179	0.004659	0.217308	0.0315113	0.481839	0.0640155	0.803855	0.097544	1.19585	0.132129	1.67302	0.167804	2.25389	0.204603	2.96098	0.242562	3.82173	0.281716	4.86953	0.322105	1.03398	0.118325	1.03398	0.118109	1.03398	0.118541					-0.0710447	0.00209311	0.000917975	0.00256585	0.00828237	0.00296226	-0.018686	0.00299699	-0.000844716	0.00298795	-0.00205299	0.00311462	0.00303942	0.0030196	-0.0154674	0.00323121	0.00174181	0.00378045
Filled Symbols	FALSE	0.03673	0.006428	0.217324	0.0314995	0.481879	0.0639912	0.803927	0.0975064	1.19596	0.132077	1.6732	0.167737	2.25415	0.20452	2.96135	0.242462	3.82225	0.281599	4.87024	0.321969	1.16959	0.129752	1.16959	0.129514	1.16959	0.129991					-0.0683906	0.00196947	0.00177364	0.00246613	0.00917971	0.00287324	-0.0169701	0.00287781	0.000598862	0.00286593	-0.0014886	0.00303061	0.00415883	0.00291334	-0.0138772	0.00314216	0.00292294	0.00365602
ConcAge	FALSE	0.07651	0.01218	0.217372	0.0314886	0.481994	0.0639688	0.804137	0.0974717	1.1963	0.13203	1.67372	0.167676	2.25491	0.204444	2.96243	0.24237	3.82375	0.281491	4.87229	0.321843	1.31424	0.141297	1.31424	0.141036	1.31424	0.141558					-0.0606449	0.00188833	0.00426954	0.00238859	0.011797	0.00281005	-0.0119625	0.00278538	0.00481078	0.00277413	0.000157226	0.0029638	0.00742439	0.00283476	-0.00923714	0.00308413	0.00636817	0.0035631
ConcSwap	FALSE	0.08632	0.01306	0.217446	0.0314796	0.482175	0.0639502	0.804468	0.0974429	1.19684	0.13199	1.67454	0.167625	2.2561	0.204381	2.96413	0.242294	3.82611	0.281401	4.87553	0.321739	1.46854	0.152959	1.46854	0.152675	1.46854	0.153243					-0.0484352	0.00185626	0.00820348	0.00233953	0.0159222	0.0027778	-0.00406904	0.00272718	0.0114498	0.00272	0.00275114	0.00291961	0.0125716	0.00279023	-0.00192299	0.00306181	0.0117984	0.00350923
1st Symbol-row	1	0.1993	0.02196	0.217542	0.0314732	0.482408	0.0639369	0.804893	0.0974224	1.19753	0.131962	1.67559	0.167588	2.25764	0.204336	2.96631	0.24224	3.82915	0.281337	4.87969	0.321665	1.63313	0.16474	1.63313	0.164433	1.63313	0.165048					-0.0327506	0.00187585	0.0132567	0.00232291	0.0212211	0.0027791	0.00607088	0.00270794	0.0199781	0.00270791	0.00608299	0.00290161	0.0191833	0.00278335	0.00747264	0.00307702	0.0187737	0.00349876
		0.1791	0.02515	0.217651	0.0314698	0.482673	0.06393	0.805378	0.0974116	1.19832	0.131947	1.67679	0.167569	2.25939	0.204312	2.9688	0.242212	3.83261	0.281304	4.88443	0.321626	1.80869	0.176642	1.80869	0.176311	1.80869	0.176973					-0.0148619	0.00194552	0.01902	0.00234007	0.0272645	0.00281386	0.0176358	0.00272921	0.0297048	0.00273885	0.00988287	0.00291128	0.0267241	0.00281468	0.0181886	0.00312853	0.0267289	0.00353254
		1.752	0.1385	0.217764	0.0314698	0.48295	0.06393	0.805884	0.0974116	1.19914	0.131947	1.67803	0.167569	2.26122	0.204312	2.97139	0.242212	3.83622	0.281304	4.88937	0.321626	1.99595	0.188666	1.99595	0.18831	1.99595	0.189021					0.00378187	0.00205963	0.0250262	0.00238964	0.0335627	0.00287925	0.0296887	0.00278927	0.0398418	0.00281031	0.0138429	0.00294782	0.0345829	0.00288169	0.0293567	0.00321215	0.0350197	0.00360784
		1.436	0.141	0.217873	0.0314732	0.483215	0.0639369	0.806369	0.0974224	1.19993	0.131962	1.67923	0.167588	2.26297	0.204336	2.97388	0.24224	3.83968	0.281337	4.89412	0.321665	2.1957	0.200812	2.1957	0.200432	2.1957	0.201192					0.0216702	0.00220893	0.0307889	0.0024676	0.0396054	0.00296997	0.0412532	0.00288325	0.0495679	0.0029165	0.0176423	0.00300827	0.042123	0.00297893	0.0400722	0.00332112	0.0429742	0.00371856
		2.199	0.1784	0.217969	0.0314796	0.483448	0.0639502	0.806794	0.0974429	1.20062	0.13199	1.68028	0.167625	2.2645	0.204381	2.97606	0.242294	3.84272	0.281401	4.89828	0.321739	2.40877	0.213082	2.40877	0.212677	2.40877	0.213488					0.0373538	0.00238132	0.0358413	0.00256762	0.0449033	0.00307869	0.0513925	0.00300354	0.0580952	0.00304881	0.0209733	0.00308774	0.0487337	0.00309855	0.049467	0.0034466	0.0499482	0.00385572
		2.125	0.1804	0.218043	0.0314886	0.48363	0.0639688	0.807125	0.0974717	1.20116	0.13203	1.6811	0.167676	2.2657	0.204444	2.97776	0.24237	3.84508	0.281491	4.90152	0.321843	2.63605	0.225478	2.63605	0.225047	2.63605	0.225909					0.0495622	0.00256284	0.0397738	0.0026816	0.0490269	0.00319658	0.059285	0.00314039	0.0647328	0.00319653	0.0235659	0.00317979	0.0538794	0.00323083	0.05678	0.00357844	0.0553765	0.00400822
		2.607	0.2135	0.218091	0.0314995	0.483744	0.0639912	0.807335	0.0975064	1.2015	0.132077	1.68162	0.167737	2.26646	0.20452	2.97884	0.242462	3.84658	0.281599	4.90357	0.321969	2.87848	0.238	2.87848	0.237543	2.87848	0.238458					0.0573063	0.00273878	0.0422681	0.00280032	0.0516423	0.00331411	0.0642913	0.00328273	0.068943	0.0033477	0.0252102	0.00327696	0.0571431	0.00336508	0.0614187	0.00370595	0.0588195	0.00416369
		4.244	0.3024	0.218107	0.0315113	0.483784	0.0640155	0.807407	0.097544	1.20161	0.132129	1.6818	0.167804	2.26672	0.204603	2.97921	0.242562	3.84709	0.281716	4.90427	0.322105	3.13707	0.250651	3.13707	0.250167	3.13707	0.251135					0.0599587	0.00289489	0.043122	0.00291415	0.0525376	0.00342174	0.066006	0.00341901	0.0703847	0.00349005	0.025773	0.00337138	0.0582606	0.0034904	0.0630074	0.00381879	0.0599982	0.00430955
		IsoLine	IsoLine	ConcTikEll	ConcTikEll	ConcTikEll	ConcTikEll	ConcTikEll	ConcTikEll	ConcTikEll	ConcTikEll	ConcTikEll	ConcTikEll	ConcTikEll	ConcTikEll	ConcTikEll	ConcTikEll	ConcTikEll	ConcTikEll	ConcTikEll	ConcTikEll	3.4129	0.26343	3.4129	0.262919	3.4129	0.263942
																						3.70712	0.276341	3.70712	0.275802	3.70712	0.27688
																						4.02096	0.289383	4.02096	0.288816	4.02096	0.28995
																						4.35573	0.302558	4.35573	0.301962	4.35573	0.303154
																						4.71281	0.315868	4.71281	0.315243	4.71281	0.316493
																						5.09371	0.329314	5.09371	0.32866	5.09371	0.329969
																						5.49999	0.342898	5.49999	0.342213	5.49999	0.343583
																						5.5	0.342898	5.5	0.342213	5.5	0.343583
																						IsoLine	IsoLine	ConcBand	ConcBand	ConcBand	ConcBand
[truncated: 28 more columns]

## Sheet: PlotDat16
Source sheet	Behr corrected	-0.005543	0.002494	0.00991371	0.00155245	0.0149074	0.00232958	0.0199257	0.00310732	0.0249689	0.00388565	0.030037	0.0046646	0.0351301	0.00544414	0.00636583	0.001	0.0063769	0.001	0.0063548	0.001	0.00493639	0.000775926	0.00856781	0.001	0.0599587	0.00289489	0.043122	0.00291415	0.0525376	0.00342174	0.066006	0.00341901	0.0703847	0.00349005	0.025773	0.00337138	0.0582606	0.0034904	0.0630074	0.00381879	0.0599982	0.00430955	0.061317	0.00472735
Plot name	Concordia16	0.02202	0.00274	0.00991304	0.00155303	0.0149064	0.00233044	0.0199243	0.00310847	0.0249672	0.00388709	0.0300349	0.00466632	0.0351277	0.00544615	0.00656624	0.00103141	0.00656624	0.00102962	0.00656624	0.00103319	0.00989716	0.00155245	0.038172	0.006	0.0590648	0.00297114	0.0428337	0.00297416	0.0522352	0.00347605	0.0654281	0.00349075	0.0698984	0.00356386	0.0255828	0.00342175	0.0578834	0.00355484	0.0624718	0.00387376	0.0596002	0.0043849	0.061025	0.00481623
Plot Type	1	0.03041	0.003192	0.00991108	0.00155355	0.0149034	0.00233124	0.0199204	0.00310952	0.0249622	0.00388841	0.0300289	0.00466791	0.0351207	0.00544801	0.0076648	0.00120341	0.0076648	0.00120133	0.0076648	0.0012055	0.0148824	0.00232958			0.0564087	0.00303438	0.0419776	0.00302778	0.0513375	0.00352261	0.0637109	0.00355478	0.0684539	0.0036288	0.0250182	0.00346724	0.0567634	0.0036111	0.0608805	0.00391922	0.0584185	0.00445097	0.060157	0.00489644
1st free col	47	0.02366	0.003208	0.009908	0.00155399	0.0148987	0.00233189	0.0199142	0.0031104	0.0249544	0.00388951	0.0300195	0.00466922	0.0351096	0.00544954	0.00876456	0.00137545	0.00876456	0.00137307	0.00876456	0.00137783	0.0198923	0.00310732			0.0520626	0.00308287	0.0405772	0.00307355	0.0498689	0.00356016	0.0609011	0.00360936	0.0660906	0.00368311	0.0240947	0.00350662	0.0549311	0.00365764	0.058277	0.00395392	0.0564854	0.00450597	0.0587299	0.00496643
Sigma Level	1	0.03477	0.003239	0.00990403	0.0015543	0.0148928	0.00233236	0.0199062	0.00311102	0.0249443	0.00389029	0.0300073	0.00467016	0.0350954	0.00545064	0.00986552	0.00154751	0.00986552	0.00154483	0.00986552	0.00155019	0.0249269	0.00388565			0.0461452	0.00311531	0.0386705	0.00311022	0.0478696	0.00358766	0.0570756	0.00365298	0.062873	0.0037253	0.0228375	0.00353881	0.0524365	0.00369321	0.0547322	0.00397692	0.0538536	0.0045484	0.0567714	0.00502482
Absolute Errs	TRUE	0.01186	0.003243	0.00989951	0.00155447	0.014886	0.00233261	0.019897	0.00311135	0.0249328	0.0038907	0.0299935	0.00467066	0.0350792	0.00545122	0.0109677	0.0017196	0.0109677	0.00171663	0.0109677	0.00172258	0.0299863	0.0046646			0.0388179	0.00313079	0.0363097	0.00313679	0.045394	0.00360437	0.0523385	0.00368447	0.0588888	0.00375423	0.0212809	0.00356293	0.0493476	0.00371682	0.0503428	0.0039876	0.0505948	0.0045771	0.0543197	0.00507049
Symbol Type	1	0.03065	0.003255	0.0098948	0.00155447	0.0148789	0.00233261	0.0198875	0.00311135	0.0249209	0.0038907	0.0299791	0.00467066	0.0350623	0.00545122	0.012071	0.00189173	0.012071	0.00188845	0.012071	0.001895	0.0350707	0.00544414			0.0302805	0.0031289	0.0335591	0.00315254	0.0425096	0.00360983	0.0468192	0.00370296	0.0542466	0.00376911	0.0194672	0.00357832	0.0457486	0.00372783	0.0452286	0.00398566	0.046798	0.00459128	0.0514224	0.00510255
Inverse Plot	FALSE	0.02377	0.003525	0.00989028	0.0015543	0.014872	0.00233236	0.0198784	0.00311102	0.0249094	0.00389029	0.0299653	0.00467016	0.035046	0.00545064	0.0131756	0.00206388	0.0131756	0.00206031	0.0131756	0.00206746	IsoLine	IsoLine			0.020766	0.0031097	0.0304937	0.00315703	0.0392952	0.00360389	0.0406681	0.00370795	0.0490732	0.00376952	0.0174461	0.00358457	0.0417378	0.00372594	0.039529	0.00397115	0.0425667	0.00459056	0.048136	0.00512037
Color Plot	TRUE	0.03087	0.004045	0.00988632	0.00155399	0.0148661	0.00233189	0.0198704	0.0031104	0.0248993	0.00388951	0.0299531	0.00466922	0.0350318	0.00544954	0.0142814	0.00223606	0.0142814	0.00223219	0.0142814	0.00223994					0.0105338	0.0030737	0.0271972	0.00315015	0.0358385	0.00358672	0.0340531	0.0036993	0.0435097	0.00375547	0.0152726	0.0035815	0.0374246	0.00371121	0.0333996	0.00394447	0.0380163	0.00457496	0.0445245	0.0051236
3D plot	FALSE	0.03143	0.004371	0.00988323	0.00155355	0.0148614	0.00233124	0.0198641	0.00310952	0.0248915	0.00388841	0.0299437	0.00466791	0.0350208	0.00544801	0.0153884	0.00240827	0.0153884	0.0024041	0.0153884	0.00241245					-0.00013694	0.00302189	0.0237595	0.00313209	0.0322337	0.00355878	0.0271547	0.00367725	0.0377077	0.00372733	0.013006	0.00356919	0.0329266	0.00368403	0.0270075	0.00390635	0.033271	0.0045449	0.0406581	0.00511218
Linear	FALSE	IsoLine	IsoLine	0.00988127	0.00155303	0.0148585	0.00233044	0.0198602	0.00310847	0.0248866	0.00388709	0.0299377	0.00466632	0.0350137	0.00544615	0.0164965	0.00258052	0.0164965	0.00257604	0.0164965	0.00258499					-0.0109551	0.00295568	0.0202743	0.00310332	0.0285791	0.00352084	0.0201608	0.0036424	0.0318257	0.00368586	0.0107082	0.00354799	0.0283664	0.00364515	0.0205271	0.00385783	0.0284603	0.00450121	0.036612	0.00508634
Data Range	J42:N52			0.0098806	0.00155245	0.0148575	0.00232958	0.0198588	0.00310732	0.0248849	0.00388565	0.0299356	0.0046646	0.0350113	0.00544414	0.0176059	0.00275279	0.0176059	0.00274802	0.0176059	0.00275756					-0.0216257	0.00287687	0.0168367	0.00306465	0.0249745	0.00347393	0.0132625	0.00359571	0.0260239	0.00363221	0.00844173	0.00351847	0.0238686	0.00359563	0.0141352	0.00380022	0.0237152	0.00444507	0.0324651	0.00504657
Filled Symbols	FALSE			0.00988127	0.00155188	0.0148585	0.00232872	0.0198602	0.00310617	0.0248866	0.00388422	0.0299377	0.00466287	0.0350137	0.00544213	0.0187165	0.00292509	0.0187165	0.00292002	0.0187165	0.00293016					-0.0318575	0.00278762	0.0135405	0.00301712	0.0215181	0.00341932	0.00664773	0.00353843	0.0204607	0.00356783	0.00626854	0.00348143	0.0195557	0.00353682	0.00800607	0.00373512	0.0191654	0.00437802	0.0282981	0.00499365
ConcAge	FALSE			0.00988323	0.00155135	0.0148614	0.00232793	0.0198641	0.00310511	0.0248915	0.0038829	0.0299437	0.00466129	0.0350208	0.00544028	0.0198284	0.00309742	0.0198284	0.00309205	0.0198284	0.00310279					-0.0413716	0.00269037	0.0104757	0.00296203	0.0183043	0.00335852	0.000497031	0.00347214	0.0152878	0.00349448	0.00424787	0.00343789	0.0155455	0.00347032	0.00230694	0.00366428	0.0149347	0.00430188	0.024192	0.00492862
ConcSwap	FALSE			0.00988632	0.00155092	0.0148661	0.00232728	0.0198704	0.00310424	0.0248993	0.0038818	0.0299531	0.00465997	0.0350318	0.00543874	0.0209414	0.00326978	0.0209414	0.00326411	0.0209414	0.00327544					-0.0499083	0.00258775	0.00772569	0.00290089	0.0154207	0.00329317	-0.00502184	0.00339865	0.0106464	0.00341416	0.00243484	0.00338904	0.0119473	0.00339795	-0.00280673	0.00358964	0.0111388	0.00421874	0.0202268	0.00485273
1st Symbol-row	1			0.00989028	0.0015506	0.014872	0.00232681	0.0198784	0.00310361	0.0249094	0.00388102	0.0299653	0.00465903	0.035046	0.00543764	0.0220556	0.00344217	0.0220556	0.0034362	0.0220556	0.00344813					-0.0572349	0.00248258	0.00536562	0.00283536	0.012946	0.00322507	-0.00975835	0.00331996	0.00666295	0.00332907	0.000878899	0.0033362	0.00885922	0.00332167	-0.00719546	0.00351323	0.00788109	0.00413086	0.0164797	0.00476746
				0.0098948	0.00155044	0.0148789	0.00232656	0.0198875	0.00310328	0.0249209	0.00388061	0.0299791	0.00465854	0.0350623	0.00543706	0.0231711	0.00361459	0.0231711	0.00360832	0.0231711	0.00362085					-0.0631515	0.00237772	0.00345983	0.00276722	0.0109476	0.00315606	-0.0135833	0.00323821	0.00344622	0.00324152	-0.000377503	0.00328082	0.00636555	0.00324358	-0.0107395	0.00343715	0.00525045	0.00404064	0.0130235	0.00467448
				0.00989951	0.00155044	0.014886	0.00232656	0.019897	0.00310328	0.0249328	0.00388061	0.0299935	0.00465854	0.0350792	0.00543706	0.0242878	0.00378703	0.0242878	0.00378047	0.0242878	0.0037936					-0.0674966	0.00227603	0.00206033	0.00269834	0.00948013	0.00308803	-0.0163923	0.00315564	0.00108391	0.0031539	-0.0013001	0.0032244	0.0045343	0.0031658	-0.0133423	0.00336347	0.00331864	0.00395054	0.0099256	0.00457559
				0.00990403	0.0015506	0.0148928	0.00232681	0.0199062	0.00310361	0.0249443	0.00388102	0.0300073	0.00465903	0.0350954	0.00543764	0.0254057	0.00395951	0.0254057	0.00395265	0.0254057	0.00396638					-0.0701518	0.00218029	0.00120526	0.0026306	0.00858356	0.00302284	-0.0181088	0.0030745	-0.000359522	0.0030686	-0.00186372	0.0031685	0.00341541	0.00309046	-0.0149327	0.00329419	0.00213837	0.00386301	0.00724627	0.00447272
				0.009908	0.00155092	0.0148987	0.00232728	0.0199142	0.00310424	0.0249544	0.0038818	0.0300195	0.00465997	0.0351096	0.00543874	0.0265248	0.00413202	0.0265248	0.00412486	0.0265248	0.00413919					-0.0710447	0.00209311	0.000917975	0.00256585	0.00828237	0.00296226	-0.018686	0.00299699	-0.000844716	0.00298795	-0.00205299	0.00311462	0.00303942	0.0030196	-0.0154674	0.00323121	0.00174181	0.00378045	0.00503764	0.00436787
				0.00991108	0.00155135	0.0149034	0.00232793	0.0199204	0.00310511	0.0249622	0.0038829	0.0300289	0.00466129	0.0351207	0.00544028	0.0276451	0.00430456	0.0276451	0.00429709	0.0276451	0.00431202					-0.0701508	0.00201686	0.00120629	0.00250584	0.00858476	0.00290795	-0.0181081	0.00292525	-0.000358434	0.00291414	-0.00186276	0.00306425	0.00341657	0.00295516	-0.0149318	0.00317624	0.0021398	0.0037051	0.00334271	0.00426308
				0.00991304	0.00155188	0.0149064	0.00232872	0.0199243	0.00310617	0.0249672	0.00388422	0.0300349	0.00466287	0.0351277	0.00544213	0.0287667	0.00447713	0.0287667	0.00446936	0.0287667	0.00448489					-0.0674947	0.00195362	0.00206236	0.00245222	0.00948248	0.00286139	-0.0163909	0.00286122	0.00108606	0.0028492	-0.0012982	0.00301876	0.00453657	0.0028989	-0.0133405	0.00313078	0.00332147	0.00363903	0.00219447	0.00416039
				0.00991371	0.00155245	0.0149074	0.00232958	0.0199257	0.00310732	0.0249689	0.00388565	0.030037	0.0046646	0.0351301	0.00544414	0.0298895	0.00464972	0.0298895	0.00464166	0.0298895	0.00465779					-0.0631486	0.00190513	0.00346281	0.00240645	0.0109511	0.00282384	-0.0135811	0.00280664	0.00344937	0.00279489	-0.000374721	0.00297938	0.00636888	0.00285236	-0.010737	0.00309608	0.0052546	0.00358403	0.00161526	0.0040618
				ConcTikEll	ConcTikEll	ConcTikEll	ConcTikEll	ConcTikEll	ConcTikEll	ConcTikEll	ConcTikEll	ConcTikEll	ConcTikEll	ConcTikEll	ConcTikEll	0.0310135	0.00482235	0.0310135	0.00481398	0.0310135	0.00483071					-0.0572312	0.00187269	0.00536946	0.00236978	0.0129504	0.00279634	-0.00975557	0.00276302	0.00666702	0.0027527	0.000882489	0.00294719	0.00886352	0.00281679	-0.00719216	0.00307308	0.00788644	0.0035416	0.00161637	0.00396923
																0.0321387	0.004995	0.0321387	0.00498634	0.0321387	0.00500367					-0.0499039	0.00185721	0.00773029	0.00234321	0.015426	0.00277963	-0.00501852	0.00273153	0.0106512	0.00272377	0.00243914	0.00292307	0.0119524	0.00279318	-0.00280278	0.0030624	0.0111452	0.0035129	0.00219776	0.00388448
																0.0332652	0.00516769	0.0332652	0.00515873	0.0332652	0.00517666					-0.0413665	0.0018591	0.0104809	0.00232746	0.0183104	0.00277417	0.000500814	0.00271304	0.0152934	0.00270889	0.00425276	0.00290768	0.0155514	0.00278217	0.00231143	0.00306434	0.014942	0.00349872	0.00334812	0.0038092
																0.0343929	0.00534041	0.0343929	0.00533114	0.0343929	0.00534967					-0.031852	0.0018783	0.0135463	0.00232297	0.0215248	0.00278011	0.00665187	0.00270805	0.0204668	0.00270848	0.00627389	0.00290143	0.0195622	0.00278406	0.00801098	0.00307885	0.0191733	0.00349944	0.00504507	0.00374485
																0.0355218	0.00551315	0.0355218	0.00550359	0.0355218	0.00552272					-0.0216198	0.0019143	0.0168428	0.00232985	0.0249815	0.00279728	0.0132669	0.0027167	0.0260303	0.00272253	0.00844739	0.0029045	0.0238754	0.00279879	0.0141404	0.00310553	0.0237237	0.00351504	0.00725557	0.00369269
																0.036652	0.00568593	0.036652	0.00567606	0.036652	0.00569579					-0.0109491	0.00196611	0.0202805	0.00234791	0.0285863	0.00282522	0.0201653	0.00273875	0.0318323	0.00275067	0.010714	0.00291681	0.0283734	0.00282597	0.0205325	0.00314365	0.028469	0.0035451	0.0099366	0.00365373
																0.0377834	0.00585873	0.0377834	0.00584856	0.0377834	0.0058689					-0.000130884	0.00203232	0.0237657	0.00237668	0.0322409	0.00286316	0.0271592	0.0027736	0.0377143	0.00279214	0.0130118	0.00293801	0.0329336	0.00286485	0.0270129	0.00319217	0.0332797	0.00358879	0.013036	0.00362873
																0.0387092	0.006	0.0387775	0.006	0.038641	0.006					0.0105397	0.00211113	0.0272033	0.00241535	0.0358455	0.00291007	0.0340575	0.00282029	0.0435161	0.00284579	0.0152783	0.00296753	0.0374314	0.00291437	0.0334048	0.00324978	0.0380248	0.00364493	0.0164934	0.00361818
																IsoLine	IsoLine	ConcBand	ConcBand	ConcBand	ConcBand					0.0207715	0.00220038	0.0304995	0.00246288	0.0393019	0.00296468	0.0406723	0.00287757	0.0490793	0.00291017	0.0174515	0.00300457	0.0417443	0.00297318	0.0395339	0.00331488	0.0425746	0.00371198	0.0202415	0.00362229
																										0.0302856	0.00229763	0.0335643	0.00251797	0.0425157	0.00302548	0.046823	0.00294386	0.0542522	0.00298352	0.0194721	0.00304811	0.0457545	0.00303968	0.0452331	0.00338572	0.0468053	0.00378812	0.0242074	0.00364096
																										0.0388223	0.00240025	0.0363143	0.00257911	0.0453993	0.00309083	0.0523418	0.00301735	0.0588936	0.00306384	0.0212852	0.00309696	0.0493527	0.00311205	0.0503467	0.00346036	0.0506012	0.00387126	0.0283138	0.00367385
																										0.0461489	0.00250542	0.0386744	0.00264464	0.047874	0.00315893	0.0570783	0.00309604	0.062877	0.00314893	0.0228411	0.0031498	0.0524408	0.00318833	0.0547355	0.00353677	0.0538589	0.00395914	0.0324809	0.0037203
																										0.0520655	0.00261028	0.0405802	0.00271278	0.0498724	0.00322794	0.0609033	0.00317779	0.0660938	0.00323648	0.0240975	0.00320518	0.0549345	0.00326642	0.0582795	0.00361285	0.0564895	0.00404936	0.0366276	0.00377942
																										0.0564106	0.00271197	0.0419797	0.00278166	0.0513399	0.00329597	0.0637123	0.00326036	0.0684561	0.0033241	0.0250201	0.0032616	0.0567657	0.0033442	0.0608823	0.00368653	0.0584214	0.00413946	0.0406731	0.00385006
																										0.0590658	0.00280771	0.0428347	0.0028494	0.0522364	0.00336116	0.0654288	0.0033415	0.0698995	0.0034094	0.0255837	0.0033175	0.0578846	0.00341954	0.0624727	0.00375581	0.0596016	0.00422699	0.0445387	0.00393083
																										0.0599587	0.00289489	0.043122	0.00291415	0.0525376	0.00342174	0.066006	0.00341901	0.0703847	0.00349005	0.025773	0.00337138	0.0582606	0.0034904	0.0630074	0.00381879	0.0599982	0.00430955	0.0481492	0.00402017
																																												0.0514342	0.00411634
																																												0.0543298	0.00421747
																																												0.0567798	0.00432158
																																												0.0587363	0.00442666
																																												0.0601614	0.00453065
																																												0.0610272	0.00463154
																																												0.061317	0.00472735

## Sheet: PlotDat17
Source sheet	Behr corrected	0.3	65.6977	1	59.64	8.506
Plot name	Average17	11.7	65.6977	2	59.8	11.5
Plot Type	15			3	61.12	5.994
1st free col	8			4	62.83	9.042
Sigma Level	1			5	63.42	8.054
Absolute Errs	TRUE			6	64.49	6.102
Symbol Type	1			7	67.75	14.054
Inverse Plot	FALSE			8	67.86	6.452
Color Plot	TRUE			9	69.12	7.224
3D plot	FALSE			10	71.76	17.81
Linear	FALSE			11	77.84	7.58
Data Range	C30:D40			IsoLine	IsoLine	IsoLine	IsoLine
Filled Symbols	FALSE
ConcAge	FALSE
ConcSwap	FALSE
1st Symbol-row	1

## Sheet: PlotDat18
Source sheet	Behr corrected	0.2	65.6977	1	59.64	8.506	0.85	51.134
Plot name	Average18	11.8	65.6977	2	59.8	11.5	1.15	51.134
Plot Type	15			3	61.12	5.994	1.15	68.146
1st free col	8			4	62.83	9.042	0.85	68.146
Sigma Level	1			5	63.42	8.054	0.85	51.134
Absolute Errs	TRUE			6	64.49	6.102	ErrBox	ErrBox
Symbol Type	1			7	67.75	14.054	1.85	48.3
Inverse Plot	FALSE			8	67.86	6.452	2.15	48.3
Color Plot	TRUE			9	69.12	7.224	2.15	71.3
3D plot	FALSE			10	71.76	17.81	1.85	71.3
Linear	FALSE			11	77.84	7.58	1.85	48.3
Data Range	C30:D40			IsoLine	IsoLine	IsoLine	ErrBox	ErrBox
Filled Symbols	TRUE						2.85	55.126
ConcAge	FALSE						3.15	55.126
ConcSwap	FALSE						3.15	67.114
1st Symbol-row	1						2.85	67.114
							2.85	55.126
							ErrBox	ErrBox
							3.85	53.788
							4.15	53.788
							4.15	71.872
							3.85	71.872
							3.85	53.788
							ErrBox	ErrBox
							4.85	55.366
							5.15	55.366
							5.15	71.474
							4.85	71.474
							4.85	55.366
							ErrBox	ErrBox
							5.85	58.388
							6.15	58.388
							6.15	70.592
							5.85	70.592
							5.85	58.388
							ErrBox	ErrBox
							6.85	53.696
							7.15	53.696
							7.15	81.804
							6.85	81.804
							6.85	53.696
							ErrBox	ErrBox
							7.85	61.408
							8.15	61.408
							8.15	74.312
							7.85	74.312
							7.85	61.408
							ErrBox	ErrBox
							8.85	61.896
							9.15	61.896
							9.15	76.344
							8.85	76.344
							8.85	61.896
							ErrBox	ErrBox
							9.85	53.95
							10.15	53.95
							10.15	89.57
							9.85	89.57
							9.85	53.95
							ErrBox	ErrBox
							10.85	70.26
							11.15	70.26
							11.15	85.42
							10.85	85.42
							10.85	70.26
							ErrBox	ErrBox

## Sheet: Whipple dikes U-Pb zircon data
Table S1: U-Pb zircon analyses of Whipple Mountain dikes
													Age (Ma)	Age (Ma)	Age (Ma)	Age (Ma)	Age (Ma)	Age (Ma)
					206Pb*/	206Pb*	207Pb*/	207Pb*/	207Pb*/	207Pb*/	238U		206Pb/	206Pb/	207Pb/	207Pb/	207Pb/	207Pb/	Pb
Sample	Analysis	Th	U	Th/U	238U	238U	206Pb*	206Pb*	235U	235U	206Pb	Rho	238U	238U	235U	235U	206Pb	206Pb	Correction	Rim/Core
						1 s.e.		1 s.e.		1 s.e.				1 s.e.		1 s.e.		1 s.e.
PW81	A1	990.9	7649	0.1296	0.2138	0.007705	0.08789	0.0003248	2.591	0.09531	4.67727	0.9951	1249	40.92	1298	26.95	1380	7.102	204Pb	Core
PW81	A2	393.1	934.1	0.4209	0.2283	0.009311	0.08865	0.00124	2.79	0.1288	4.3802	0.9557	1325	48.87	1353	34.5	1397	26.82	204Pb	Core
PW81	A3	4648	16660	0.2789	0.004033	0.0001362	0.04926	0.002532	0.02739	0.001776	247.954	0.6173	25.95	0.8743	27.44	1.756	160.4	120.2	208Pb	Rim
PW81	A3-2	3693	3452	1.07	0.004037	0.0001727	0.05815	0.009783	0.03237	0.006016	247.709	0.5077	25.97	1.109	32.34	5.917	535.5	368.2	208Pb	Rim
PW81	A4	109.4	1038	0.1053	0.02687	0.001288	0.05504	0.002803	0.2039	0.01224	37.2162	0.5747	170.9	8.087	188.4	10.32	414	113.8	208Pb	Core
PW81	A5	1.263	487.2	0.002564	0.003395	0.000258	0.0545	0.02564	0.02551	0.01252	294.551	0.3382	21.85	1.658	25.58	12.39	391.6	1056	208Pb	Rim
PW81	A6	3163	5075	0.6235	0.003643	0.0001372	0.058	0.006599	0.02913	0.003482	274.499	0.3072	23.44	0.8814	29.16	3.436	529.8	249.3	208Pb	Rim
PW81	A7	71.7	2974	0.02412	0.003695	0.0001632	0.05029	0.00535	0.02562	0.002924	270.636	0.3625	23.77	1.048	25.69	2.894	208.6	246.7	208Pb	Rim
PW81	A7-2	495.8	970.6	0.5168	0.09149	0.006187	0.09938	0.002192	1.254	0.09248	10.9302	0.9551	564.3	36.54	825	41.67	1613	41.08	204Pb	Core
PW81	A8	246.1	17340	0.01416	0.003822	0.0001257	0.04868	0.001941	0.02565	0.001285	261.643	0.6071	24.59	0.8072	25.72	1.272	132.5	93.77	208Pb	Rim
PW81	A9	288.7	3776	0.07649	0.003412	0.000123	0.05006	0.005869	0.02355	0.003089	293.083	0.5032	21.96	0.7902	23.64	3.065	197.7	272.4	208Pb	Rim
PW81	B1	7.753	1215	0.006459	0.003269	0.0001726	0.03985	0.008829	0.01796	0.004179	305.904	0.3195	21.04	1.109	18.07	4.169	-1	0.008829	208Pb	Rim
PW81	B2	224.1	3321	0.06795	0.004499	0.0002068	0.04773	0.006649	0.02961	0.004158	222.272	0.1875	28.94	1.327	29.63	4.1	85.69	330.5	208Pb	Rim
PW81	B3	197.1	3450	0.05715	0.003569	0.0001261	0.03264	0.00504	0.01606	0.002479	280.191	0.1122	22.97	0.8103	16.18	2.478	-1	0.00504	208Pb	Rim
PW81	B4	93.19	2196	0.04244	0.003775	0.0001709	0.05213	0.006125	0.02713	0.003518	264.901	0.431	24.29	1.098	27.18	3.478	291.1	268.4	208Pb	Rim
PW81	B5	322.3	2734	0.1179	0.003892	0.0001665	0.04371	0.006975	0.02345	0.003937	256.937	0.3162	25.04	1.069	23.54	3.906	-1	0.006975	208Pb	Rim
PW81	B6	138.1	2318	0.05958	0.003928	0.0002001	0.05916	0.007171	0.03204	0.004102	254.582	0.3296	25.27	1.285	32.02	4.036	573	263.6	208Pb	Rim
PW81	B7	3302	10230	0.3232	0.003917	0.0001399	0.05433	0.004519	0.02934	0.002727	255.297	0.4515	25.2	0.8984	29.36	2.69	384.7	186.9	208Pb	Rim
PW81	B8	3.772	616.6	0.006109	0.004	0.0003562	0.06309	0.02964	0.03479	0.01649	250	0.1408	25.73	2.287	34.73	16.18	711.3	998.5	208Pb	Rim
PW82	A1	11.29	352.1	0.03204	0.009294	0.0006659	0.06039	0.01246	0.07739	0.0172	107.596	0.3742	59.64	4.253	75.69	16.21	617.7	445.5	208Pb	Rim
PW82	A2	43.19	993.5	0.04351	0.01058	0.0005057	0.05625	0.005433	0.08208	0.009241	94.518	0.5232	67.86	3.226	80.09	8.671	462.2	214.1	208Pb	Rim
PW82	A3	21.98	297.6	0.07439	0.009794	0.0007082	0.05344	0.01463	0.07217	0.02115	102.103	0.3816	62.83	4.521	70.76	20.03	347.7	618.9	208Pb	Rim
PW82	A4	5.095	198.2	0.02506	0.00932	0.0009003	0.04545	0.03148	0.0584	0.04128	107.296	0.2127	59.8	5.75	57.63	39.6	-1	0.03148	208Pb	Rim
PW82	A5	6.061	168.1	0.03602	0.01057	0.001102	0.07023	0.03345	0.1023	0.05228	94.6074	0.4238	67.75	7.027	98.91	48.16	935.1	976.9	208Pb	Rim
PW82	A6	13.62	468.4	0.02901	0.007284	0.0003105	0.03383	0.01363	0.03397	0.01405	137.287	0.2994	46.78	1.987	33.92	13.8	-1	0.01363	208Pb	Rim
PW82	A7	15.8	262.5	0.06096	0.01119	0.001397	0.04644	0.01748	0.07168	0.02831	89.3655	0.3032	71.76	8.905	70.29	26.82	20.42	903.8	208Pb	Rim
PW82	A8	17.2	554.6	0.03082	0.01005	0.000478	0.05308	0.008941	0.07359	0.01295	99.5025	0.2912	64.49	3.051	72.1	12.25	332.4	381.9	208Pb	Rim
PW82	A9	126.1	1204	0.1047	0.01215	0.0005951	0.05822	0.005812	0.09752	0.01125	82.3045	0.5086	77.84	3.79	94.48	10.41	538.1	218.4	208Pb	Rim
PW82	A10	70.45	997.6	0.07068	0.01078	0.0005664	0.04812	0.005586	0.07153	0.009302	92.7644	0.4535	69.12	3.612	70.15	8.815	105.4	274.3	208Pb	Rim
PW82	A11	47.73	1096	0.04349	0.009526	0.0004694	0.04125	0.005158	0.05418	0.006692	104.976	0.1685	61.12	2.997	53.57	6.446	-1	0.005158	208Pb	Rim
PW82	A12	12.36	291.8	0.04245	0.009886	0.0006309	0.05319	0.01727	0.0725	0.02526	101.153	0.4509	63.42	4.027	71.07	23.91	336.8	735.5	208Pb	Rim
Key:	Inherited core
	Outside 2 sigma or removed as problematic
