# Supplementary material for: Rheological transitions in the middle crust: insights from Cordilleran metamorphic core complexes
Source: Copernicus journal article supplement (doi:10.5194/se-8-199-2017), 2017-02-21
Supplement: Supplementary file [file se-8-199-2017-supplement-title-page.pdf › se-8-199-2017-supplement-title-page.pdf]

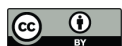

## *Supplement of*

# **Rheological transitions in the middle crust: insights from Cordilleran metamorphic core complexes**

**Frances J. Cooper et al.**

*Correspondence to:* Frances J. Cooper ([frances.cooper@bristol.ac.uk](mailto:frances.cooper@bristol.ac.uk))

- [se-8-199-2017-supplement-title-page.pdf](#)
- [Cooper\\_SolidEarth\\_supplement\\_Feb19.pdf](#)
- [TableS1\\_U-Pb\\_zircon\\_data.xlsx](#)

The copyright of individual parts of the supplement might differ from the CC-BY 3.0 licence.
